## Drift on holey landscapes as a dominant evolutionary process

**Authors:** Ned A. Dochtermann <sup>a,b</sup> Brady Klock <sup>a,\*</sup>, Derek A. Roff <sup>c,\*</sup>, & Raphaël Royauté <sup>d,\*</sup>

### Affiliations:

<sup>a</sup> Department of Biological Sciences; North Dakota State University

<sup>b</sup> [ned.dochtermann@gmail.com](mailto:ned.dochtermann@gmail.com)

<sup>c</sup> Department of Biology; University of California, Riverside

<sup>d</sup> French National Institute for Agriculture, Food, and Environment (INRAE), Versailles Cedex, France

\* these authors are listed in alphabetical order

**Abstract:** Phenotypes typically display integration, i.e. correlations between traits. For quantitative traits—like many behaviors, physiological processes, and life-history traits—patterns of integration are often assumed to have been shaped by the combination of linear, non-linear, and correlated selection, with trait correlations representative of optimal combinations and reflective of the adaptive landscapes that have shaped a population. Unfortunately, this assumption has rarely been critically tested, in part due to a lack of clear alternatives. Here we show that trait integration across 6 phyla and 60 species (including both Plantae and Animalia) is consistent with evolution across high dimensional “holey landscapes” rather than classical models of selection. This suggests that the leading conceptualizations and modeling of the evolution of trait integration fail to capture how phenotypes are shaped and that traits are integrated in a manner contrary to predictions of dominant evolutionary theory.

**One-Sentence Summary:** Patterns of correlations among traits are inconsistent with dominant models of evolution and suggest, instead, that quantitative traits have predominantly evolved via drift of populations across high dimensional holey landscapes.

1 A common attribute of most organisms is  
2 that they display trait integration. For  
3 example, life-history traits are often  
4 correlated according to a slow-fast  
5 continuum<sup>1,2</sup>. This trait integration is  
6 commonly understood in terms of trade-  
7 offs and fitness maximization<sup>3-8</sup> and is  
8 frequently modeled as populations  
9 moving across adaptive landscapes  
10 toward peaks of higher fitness. However,  
11 this adaptive perspective has rarely been  
12 evaluated due to a lack of clear  
13 alternatives. Consequently, much of our  
14 understanding of when and why  
15 quantitative traits are correlated might be  
16 shaped by adaptive just-so-stories<sup>9</sup>.

### Competing evolutionary processes

17 Our understanding of selection has been  
18 strongly shaped by Sewall Wright's  
19 conceptualization of an adaptive  
20 landscape, with populations moving from  
21 areas of low fitness to areas of higher  
22 fitness<sup>10,11</sup>. While the simple one and two  
23 trait landscapes Wright originally detailed  
24 have been criticized as unrealistic,  
25 including by Wright himself<sup>10</sup>, the general  
26 metaphor has nonetheless guided much of  
27 evolutionary thought<sup>12</sup>.

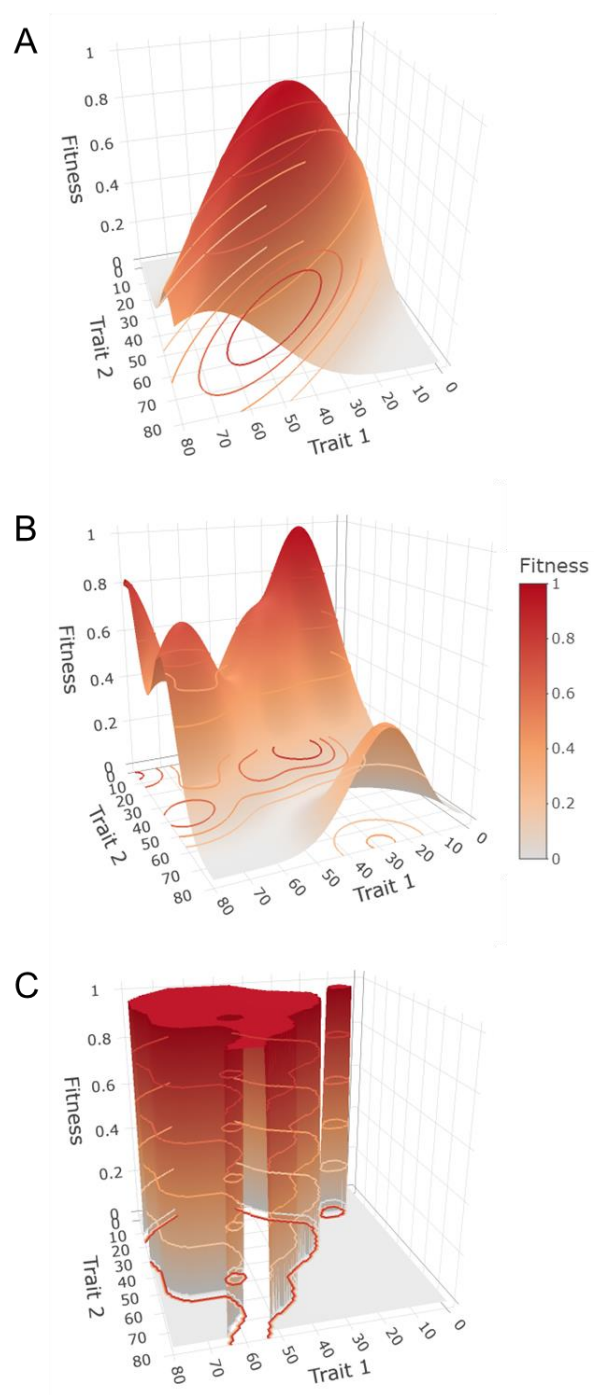

Figure 1. Example fitness landscapes. Redder colors correspond to higher fitness. A. A simple Gaussian, single peak Fujiyama landscape with a single optimum (1). B. A more rugged landscape with multiple local optima and a single global optimum. C. A simplified Holey landscape where particular combinations of values correspond to high, average, fitness (1) or low (0) fitness.

28 For quantitative traits, like many aspects of physiology, behavior, and morphology,  
29 Wright's metaphor has been mathematically extended to complex topographies with ridges  
30 or tunnels of high fitness<sup>13-15</sup>. Applying these adaptive landscape topologies in  
31 mathematical models has led to insights into how evolutionary change may not be  
32 monotonic and how correlations may evolve<sup>15</sup>. Simulations have similarly led to the  
33 prediction that landscapes with complex topographic features like fitness ridges result in  
34 populations with genetic correlations aligned with these ridges<sup>3-5</sup>. This has led, for  
35 example, to an ability to predict how the pace of evolution might be constrained<sup>16</sup>.

36 Concurrent to the study of quantitative trait variation, the question of how the  
37 topography of fitness landscapes affects sequence evolution at the genomic level has  
38 garnered similar interest<sup>17</sup>. Whereas theoreticians interested in quantitative trait variation  
39 have focused on relatively simple landscapes e.g.<sup>3,4,5,18-20</sup>, theoretical research regarding  
40 sequence evolution has spanned simple single peak Gaussian "Fujiyama landscapes", to  
41 "badlands landscapes" (Fig 1A & 1B<sup>21</sup>), to abstract high-dimensional "holey landscapes"  
42 (Fig 1C<sup>22</sup>). Among other topics, this research has explored how topographies of varying  
43 complexity (Fig 1) affect the ability of populations to reach optima<sup>17</sup>. An important  
44 conclusion from this research is that evolutionary dynamics on simple landscapes often fail  
45 to properly predict evolution on landscapes of higher dimensionality.

46 Of these landscapes, perhaps most conceptually unfamiliar and unintuitive to  
47 researchers focused on quantitative trait evolution are Gavrillets' (1997) holey landscapes  
48 (Fig 1C). Holey landscapes consist of trait combinations conferring either average fitnesses  
49 or zero. The general concept of holey landscapes is that, because phenotypes are made up  
50 of a large number of traits, phenotypes are abstract high dimensional constructs and  
51 corresponding landscapes will consist of either trait combinations that are of average  
52 fitness or trait combinations that confer low fitness or are inviable<sup>22,23</sup>. This results in flat  
53 landscapes with holes at inviable or low fitness phenotypes (Fig 1C). The flat landscape can  
54 be understood as stemming from the full multivariate nature of the phenotype: while there  
55 may be clear fitness differences in two dimensions, strong gradients will create holes in the  
56 landscape and peaks will average out when additional traits are considered. This is  
57 conceptually related to more recent discussions of the Pareto optimization of traits<sup>24,25</sup>.

58 Under Pareto optimization across just three traits a flat fitness surface—the Pareto front—  
59 connects single trait × environment optima (i.e. “archetypes”<sup>25</sup>). Likewise, rugged  
60 landscapes can create steep fitness declines and consequent holes in the overall landscape.  
61 Unfortunately, predictions about quantitative trait evolution on holey landscapes are not  
62 clear.

63 Even more broadly, it is not clear what the topography of landscapes typically is for  
64 natural populations. While portions of selection surfaces and fitness landscapes can be  
65 directly estimated<sup>26,27</sup>, these estimates may differ from the underlying full landscape due  
66 to several factors. These include: the omission of fitness affecting traits<sup>28</sup>, incomplete  
67 estimation of fitness<sup>29,30</sup>, and insufficient power to estimate non-linear selection  
68 coefficients<sup>31</sup>. An alternative to direct estimation of adaptive landscape topography is to  
69 infer landscape topography from observed trait (co)variances. For example, low additive  
70 genetic variation is suggestive of stabilizing or directional selection<sup>32</sup>, and additive genetic  
71 correlations are expected to emerge from correlational selection and fitness ridges in a  
72 landscape, e.g.<sup>13,14</sup>. Thus, an ability to gain an understanding of the topography of adaptive  
73 landscapes based on observed trait variation would aid our understanding as to how  
74 selection is realized in natural populations.

75 Here we used a simulation model to examine how evolution on different landscapes  
76 contributes to patterns of trait integration. We modeled populations that evolved solely via  
77 drift, that evolved via adaptation on simple Gaussian fitness landscapes stemming from  
78 Wright’s metaphor, or that evolved on holey landscapes. This allowed us to generate  
79 testable predictions for how the structure of additive genetic variances and covariances (**G**)  
80 are shaped by different landscape topographies. We next compared these modeled  
81 outcomes to 181 estimates of **G**, representing 60 species from 6 phyla, including both  
82 plants and animals, to determine if observed trait integration is consistent with any of the  
83 modeled processes.

#### 84 *Model Construction*

85 We developed an individual variance components model (Methods, Fig S1<sup>33</sup>) wherein  
86 individuals had phenotypes comprised of 10 traits ( $k$ ), with each trait being highly  
87 heritable ( $h^2 = 0.8$ ), and initial genetic covariances between traits set at zero. Populations

88 of individuals evolved on one of five landscapes: (i) a flat landscape where no selection  
89 occurred (i.e. drift alone), (ii) Gaussian landscapes where fitness for each pair of traits was  
90 characterized by a single peak but with correlational selection, and three (iii – v)  
91 implementations of holey landscapes differing by  $p$ <sup>22,23</sup>, the proportion of viable  
92 phenotypes in a holey landscape ( $p = 0.2, 0.5, \text{ and } 0.8$ ). Each of the modeling scenarios was  
93 simulated 250 times for populations of 7500 individuals and for 100 generations for each  
94 population. Full modeling details are provided in the Methods and all modeling code is  
95 available at <https://github.com/DochtermannLab/Wright vs Holey>.

### 96 *Model analysis*

97 Following these simulations, the eigen structures of the resulting 1250 population genetic  
98 covariance matrices were compared. Because the simulated phenotypes consisted of 10  
99 traits, it was the overall multivariate pattern of variation that was of interest rather than  
100 any specific single trait or pairwise combination. To do so, we calculated the ratio of each  
101 matrix's second eigen value ( $\lambda_2$ ) to its dominant eigen value (i.e.  $\lambda_2/\lambda_1$ ). This metric  
102 provides a better estimate of the compression of variance into a leading dimension than do  
103 other common metrics like the variation of the first eigen value to the sum of eigen values  
104 (i.e.  $\lambda_1/\sum \lambda$ ). For example,  $\lambda_1/\sum \lambda$  could be low if the variation not captured by  $\lambda_1$  is equally  
105 distributed across all other dimensions, even if all other dimensions contained relatively  
106 little variation. The same scenario would produce a high value for  $\lambda_2/\lambda_1$ .

107  $\lambda_2/\lambda_1$  was then compared across the modeling scenarios using analysis of variance  
108 and Tukey post-hoc testing. Four alternative metrics for characterizing covariance matrices  
109 were consistent with the results for  $\lambda_2/\lambda_1$  (see Supplementary Results). We also present  
110 the results of analyses of a broad range of starting conditions and model conditions in the  
111 Supplementary Results. These supplemental analyses confirmed the robustness of the  
112 findings reported below.

### 113 *Model outcomes*

114 When evolving on holey landscapes, populations lost greater relative variation in the non-  
115 dominant dimensions as compared to when evolving on simple Gaussian landscapes or  
116 when subject solely to drift (Fig 2; Fig S5).  $\lambda_2/\lambda_1$  significantly differed depending on

117 selection regime ( $F_{4,1245} = 368$ ,  $p \ll 0.01$ ; Fig 2). Populations experiencing either just drift  
118 or evolving on Gaussian landscapes maintained a more even amount of variation across  
119 dimensions compared to those evolving on holey landscapes (i.e. higher  $\lambda_2/\lambda_1$  all post-hoc  
120 comparisons  $p < 0.001$ ; Fig 2, Table S3). All populations evolving on holey landscapes  
121 exhibited similar  $\lambda_2/\lambda_1$  ratios regardless of  $p$  (all post-hoc comparisons of outcomes for  
122 holey landscapes:  $p > 0.05$ ; Fig 2, Table S3). This similarity likely is due to the observation  
123 elsewhere that, when  $p$  is greater than  $1/2^k$ , a cluster of viable phenotypic values—and  
124 therefore phenotypic space exists—through which a population can drift<sup>34,35</sup>. Given that  $k$   
125 here was 10, this condition was satisfied.

126 While a modest difference, populations evolving due to drift alone also exhibited a  
127 significantly greater ratio than populations evolving on Gaussian landscapes (difference =  
128 0.06,  $p = 0.002$ ; Fig 2, Table S3). This magnitude of a difference is unlikely to be biologically  
129 important or detectable in natural populations and instead is likely driven by the high  
130 power available with simulations. These differences were consistent across multiple  
131 approaches to summarizing  $\mathbf{G}$  and are robust to conditions of the simulations (Tables S4 –  
132 S7, Figs S6 – S8). Interestingly, examination of single population outcomes suggests that the  
133 outcomes observed for populations evolving on Gaussian landscapes stem from the  
134 populations becoming trapped at local optima (e.g. Fig S4).

135 *These modeling results produce the general prediction that greater relative variation*  
136 *in multiple dimensions is maintained when populations evolve on Gaussian landscapes than*  
137 *when evolving on holey landscapes. Put another way, evolving on holey landscapes is*  
138 *predicted to result in a large decrease in variation from the dominant to subsequent*  
139 *dimensions and, consequently, a lower  $\lambda_2/\lambda_1$  value (Fig 2).*

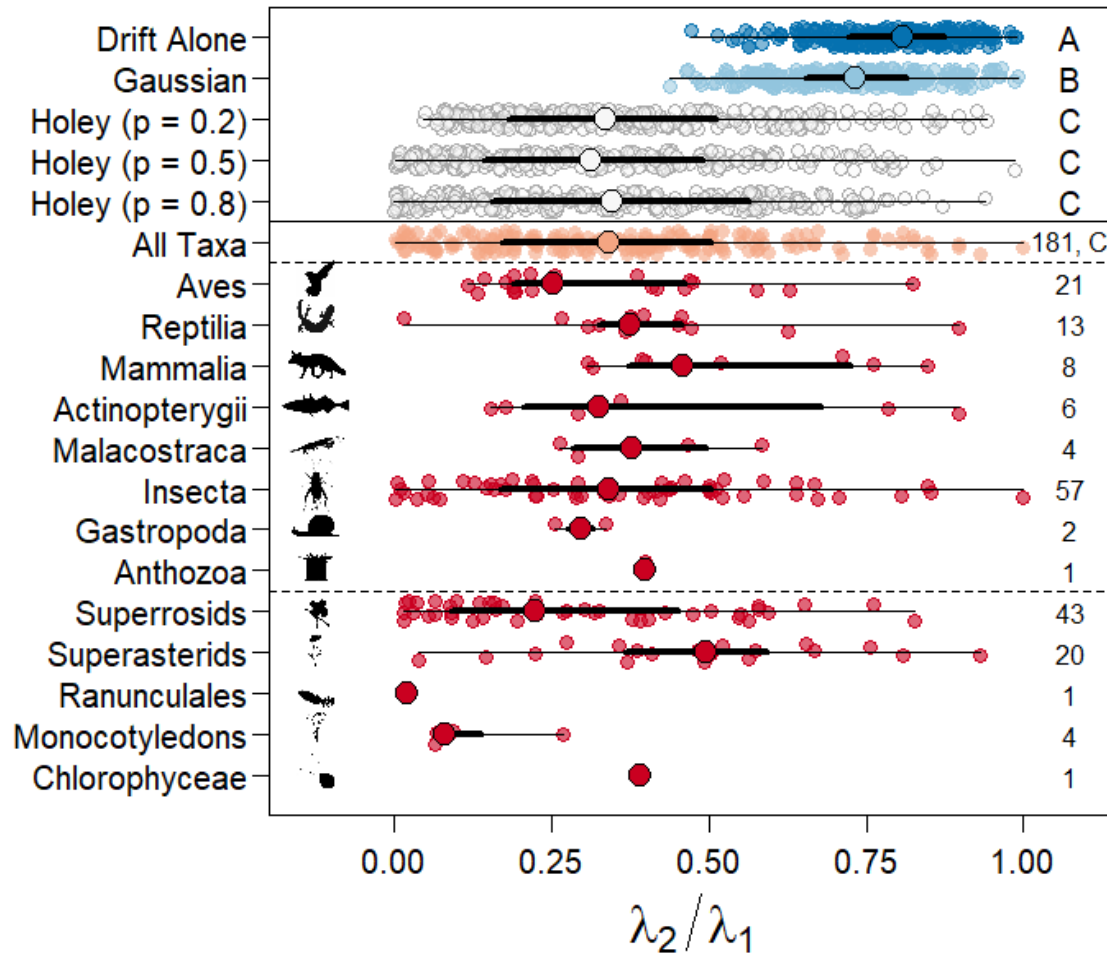

140  
 141 Figure 2. Modified “Orchard plot” of  $\lambda_2/\lambda_1$  values for simulated (above solid line) and observed  $G$  matrices.  
 142 *Trunks* (large points) are the medians for the specified group (e.g. Gaussian landscapes or Insecta), *branches*  
 143 (thick lines) are interquartile ranges, *twigs* (thin lines) give the full range of values, and *fruits* (smaller points)  
 144 are individual estimates within a simulation or taxonomic group. Rightmost letters correspond to statistical  
 145 significance—or lack thereof—of comparisons of ratios among simulations. Datasets sharing letters did not  
 146 significantly differ (Table S3). Populations evolving due to drift alone had a significantly higher ratio than  
 147 observed for either stabilizing selection or evolution on any of the holey landscapes. Populations evolving on  
 148 holey landscapes also had lower ratios than those experiencing stabilizing selection but did not differ from  
 149 each other. Rightmost numbers are the number of estimates available via literature search. (organism  
 150 silhouettes courtesy of phylopic.org, Public Domain Mark 1 licenses or CCA 3.0; Chlorophyceae: S.A. Muñoz-  
 151 Gómez, Superrosid: D.J. Bruzese, Superasterid: T.M. Keesey & Nadiatalent).

## 152 **Observed patterns of trait integration**

153 We next wanted to determine which of the modeled processes produced results consistent  
154 with observed patterns of trait integration. To do so, we conducted a literature review  
155 wherein we used Web of Science to search the journals American Naturalist, Ecology and  
156 Evolution, Evolution, Evolutionary Applications, Evolutionary Ecology, Genetics, Heredity,  
157 Journal of Evolutionary Biology, Journal of Heredity, Nature Ecology and Evolution, and the  
158 Proceedings of the Royal Society (B). We searched these journals using the terms “G  
159 matrix” on 14 May 2019, yielding a total of 272 articles. Each article was reviewed and  
160 estimated **G** matrices extracted if the article met inclusion criteria. For inclusion, an  
161 estimated **G** matrix must have been estimated for more than 2 traits (i.e.  $> 2 \times 2$ ), must  
162 have been reported as variances and covariances (i.e. not genetic correlations), and must  
163 not have been estimated for humans. Based on these inclusion criteria, we ended up with a  
164 dataset of 181 estimated **G** matrices from 60 articles (Fig S2). For each published **G** matrix,  
165 we estimated  $\lambda_2/\lambda_1$ .

### 166 *Observed outcomes*

167 Across all taxa, average  $\lambda_2/\lambda_1$  was 0.36 (sd: 0.23, Fig 2). This estimate is consistent with  
168 and statistically indistinguishable from those observed for simulated populations evolving  
169 on Holey landscapes ( $t_{df:17.275} = 0.32, 1.20, -0.05, p > 0.2$  (all) versus Holey landscapes with  
170  $p = 0.2, 0.5, \text{ and } 0.8$  respectively; Fig 2, Table S10) and substantially less than observed for  
171 simulated populations that evolved on Gaussian landscapes or via drift alone ( $t_{df:17.275} = -$   
172  $12.42, -14.55$  respectively,  $p < 0.001$  (both)).

173 While some individual estimates at the species level exhibited high  $\lambda_2/\lambda_1$  values (Fig  
174 2), phylogeny explained little variation in these values (phylogenetic heritability = 0.05;  
175 Table S9). As was the case across all taxa, median  $\lambda_2/\lambda_1$  values for each taxonomic Class (or  
176 comparable level clade) were consistently lower than expected if evolution occurred on  
177 Gaussian landscapes or via drift alone (Fig 2). Instead, these results are strongly consistent  
178 with evolution on Holey landscapes.



## 179 **Conclusions**

180 The observation that traits linked to fitness are frequently correlated has been a major  
181 driver of research across evolutionary ecology. Research in life-history, physiology, and  
182 behavior has frequently been structured around such observations, arguing that this  
183 integration stems from optimization in the face of trade-offs<sup>1,2,36-38</sup>. However, because  
184 selection is frequently acting on many traits, patterns of integration quickly diverge from  
185 simple expectations, even under conventional models of evolution. *However, our results*  
186 *suggest something substantively different is occurring: the observed pattern of variation*  
187 *across taxa suggests that classic models of the evolution of quantitative traits—e.g. stabilizing*  
188 *and correlational selection—are not what have predominantly shaped trait integration.*  
189 Instead, drift across holey landscapes<sup>22,23</sup> is more consistent with observed quantitative  
190 genetic variation (Fig 2).

191 Much of the theoretical development of holey landscapes focused on the ability of  
192 populations to traverse genomic sequence differences via drift, with some sequences being  
193 inviable (e.g. due to missense differences in coding regions). How this extended to  
194 quantitative traits was less clear. Our simulation model provides one approach to applying  
195 the holey landscape framework to quantitative traits, treating each trait as a threshold  
196 character<sup>39</sup>. Other approaches to modeling quantitative traits on holey landscapes and  
197 evolution in response to these versions, such as the generalized Russian roulette model<sup>23</sup>,  
198 may produce different outcomes. It is also important to recognize that the broad support  
199 for evolution on holey landscapes does not preclude subsets of traits from having evolved  
200 on Gaussian landscapes. Indeed, stabilizing selection has been observed in natural  
201 populations<sup>31</sup>, though understanding its general strength even on a case-by-case basis is  
202 confounded with methodological problems<sup>40,41</sup>. Regardless, our finding that observed  
203 patterns of quantitative genetic variation across taxonomic groups are not consistent with  
204 traditional evolutionary models stands.

205 This disconnect between observed patterns of multivariate variation and  
206 expectations under conventional models of selection suggests that Wright's metaphor of  
207 fitness landscapes and the subsequent implementation of this metaphor as Gaussian  
208 surfaces may have contributed to an improper, or at least incomplete, understanding of

209 how selection has shaped phenotypes. A potential contributor to this problem has been the  
210 lack of clear alternative explanations besides a simple null hypothesis of drift with no  
211 selection. Moving forward, clear development of alternative models of the action of  
212 selection and evolution in multivariate space are needed.

## 213 References Cited

- 214
- 215 1 Wright, J., Solbu, E. B. & Engen, S. Contrasting patterns of density-dependent selection at  
216 different life stages can create more than one fast-slow axis of life-history variation. *Ecol.*  
217 *Evol.* **10**, 3068-3078 (2020).
  - 218 2 Ricklefs, R. E. & Wikelski, M. The physiology/life-history nexus. *Trends in Ecology &*  
219 *Evolution* **17**, 462-468 (2002).
  - 220 3 Arnold, S. J., Burger, R., Hohenlohe, P. A., Ajie, B. C. & Jones, A. G. Understanding the  
221 evolution and stability of the G-matrix. *Evolution* **62**, 2451-2461, doi:10.1111/j.1558-  
222 5646.2008.00472.x (2008).
  - 223 4 Jones, A. G., Arnold, S. J. & Borger, R. Stability of the G-matrix in a population experiencing  
224 pleiotropic mutation, stabilizing selection, and genetic drift. *Evolution* **57**, 1747-1760  
225 (2003).
  - 226 5 Jones, A. G., Arnold, S. J. & Burger, R. Evolution and stability of the G-matrix on a landscape  
227 with a moving optimum. *Evolution* **58**, 1639-1654 (2004).
  - 228 6 Roff, D. A. *Life history evolution*. (Sinauer Associates, Inc., 2002).
  - 229 7 Van Noordwijk, A. J. & de Jong, G. Acquisition and allocation of resources: their influence on  
230 variation in life history tactics. *American Naturalist*, 137-142 (1986).
  - 231 8 Reznick, D., Nunney, L. & Tessier, A. Big houses, big cars, superfleas and the costs of  
232 reproduction. *Trends in Ecology & Evolution* **15**, 421-425 (2000).
  - 233 9 Gould, S. J. & Lewontin, R. C. Spandrels Of San-Marco And The Panglossian Paradigm - A  
234 Critique Of The Adaptationist Program. *Proceedings Of The Royal Society Of London Series B-*  
235 *Biological Sciences* **205**, 581-598 (1979).
  - 236 10 Wright, S. Surfaces of selective value revisited. *The American Naturalist* **131**, 115-123  
237 (1988).
  - 238 11 Wright, S. The roles of mutation, inbreeding, crossbreeding and selection in evolution, pp.  
239 356-366 in *Proceedings of the Sixth International Congress of Genetics*, edited by D. Jones.  
240 *Ithaca, NY* (1932).
  - 241 12 Olson, M. E., Arroyo-Santos, A. & Vergara-Silva, F. A user's guide to metaphors in ecology  
242 and evolution. *Trends in ecology & evolution* (2019).
  - 243 13 Armbruster, W. & Schwaegerle, K. Causes of covariation of phenotypic traits among  
244 populations. *Journal of Evolutionary Biology* **9**, 261-276 (1996).
  - 245 14 Armbruster, W. S. Estimating and testing the shapes of adaptive surfaces: the morphology  
246 and pollination of *Dalechampia* blossoms. *The American Naturalist* **135**, 14-31 (1990).
  - 247 15 Phillips, P. C. & Arnold, S. J. Visualizing multivariate selection. *Evolution* **43**, 1209-1222  
248 (1989).
  - 249 16 Dochtermann, N. A. & Dingemanse, N. J. Behavioral syndromes as evolutionary constraints.  
250 *Behavioral Ecology* **24**, 806-811 (2013).
  - 251 17 Kauffman, S. & Levin, S. Towards a general theory of adaptive walks on rugged landscapes.  
252 *Journal of Theoretical Biology* **128**, 11-45 (1987).

- 253 18 Bulmer, M. The genetic variability of polygenic characters under optimizing selection,  
254 mutation and drift. *Genetics Research* **19**, 17-25 (1972).
- 255 19 Reeve, J. P. Predicting long-term response to selection. *Genetics Research* **75**, 83-94 (2000).
- 256 20 Turelli, M. Phenotypic evolution, constant covariances, and the maintenance of additive  
257 variance. *Evolution* **42**, 1342-1347 (1988).
- 258 21 Kauffman, S. A. & Weinberger, E. D. The NK model of rugged fitness landscapes and its  
259 application to maturation of the immune response. *Journal of theoretical biology* **141**, 211-  
260 245 (1989).
- 261 22 Gavrillets, S. Evolution and speciation on holey adaptive landscapes. *Trends in ecology &*  
262 *evolution* **12**, 307-312 (1997).
- 263 23 Gavrillets, S. *Fitness Landscapes and the Origin of Species*. (Princeton University Press, 2004).
- 264 24 Petrie, K. L. *et al.* Destabilizing mutations encode nongenetic variation that drives  
265 evolutionary innovation. *Science* **359**, 1542-1545 (2018).
- 266 25 Shoval, O. *et al.* Evolutionary trade-offs, Pareto optimality, and the geometry of phenotype  
267 space. *Science* **336**, 1157-1160 (2012).
- 268 26 Lande, R. & Arnold, S. J. The measurement of selection on correlated characters. *Evolution*  
269 **37**, 1210-1226 (1983).
- 270 27 Morrissey, M. B. In search of the best methods for multivariate selection analysis. *Methods*  
271 *Ecol. Evol.* **5**, 1095-1109 (2014).
- 272 28 Delcourt, M., Blows, M. W., Aguirre, J. D. & Rundle, H. D. Evolutionary optimum for male  
273 sexual traits characterized using the multivariate Robertson–Price Identity. *Proceedings of*  
274 *the National Academy of Sciences* **109**, 10414-10419 (2012).
- 275 29 Arnold, S. J. & Wade, M. J. On the measurement of natural and sexual selection: theory.  
276 *Evolution* **38**, 709-719 (1984).
- 277 30 Shaw, R. G. & Geyer, C. J. Inferring fitness landscapes. *Evolution* **64**, 2510-2520 (2010).
- 278 31 Kingsolver, J. G. *et al.* The strength of phenotypic selection in natural populations. *The*  
279 *American Naturalist* **157**, 245-261 (2001).
- 280 32 Mousseau, T. A. & Roff, D. A. Natural selection and the heritability of fitness components.  
281 *Heredity* **59**, 181-197 (1987).
- 282 33 Roff, D. *Modeling evolution: an introduction to numerical methods*. (Oxford University Press,  
283 2010).
- 284 34 Gavrillets, S. & Gravner, J. Percolation on the fitness hypercube and the evolution of  
285 reproductive isolation. *Journal of theoretical biology* **184**, 51-64 (1997).
- 286 35 Gravner, J., Pitman, D. & Gavrillets, S. Percolation on fitness landscapes: effects of correlation,  
287 phenotype, and incompatibilities. *Journal of theoretical biology* **248**, 627-645 (2007).
- 288 36 Roff, D. A. & Fairbairn, D. J. The evolution of trade-offs: where are we? *Journal Of*  
289 *Evolutionary Biology* **20**, 433-447 (2007).
- 290 37 Réale, D. *et al.* Personality and the emergence of the pace-of-life syndrome concept at the  
291 population level. *Philos. Trans. R. Soc. B-Biol. Sci.* **365**, 4051-4063,  
292 doi:10.1098/rstb.2010.0208 (2010).
- 293 38 Houle, D. Genetic covariance of fitness correlates--what genetic correlations are made of  
294 and why it matters. *Evolution* **45**, 630-648, doi:10.1111/j.1558-5646.1991.tb04334.x  
295 (1991).
- 296 39 Lynch, M. & Walsh, B. *Genetics and Analysis of Quantitative Traits*. 980 (Sinauer Associates,  
297 1998).
- 298 40 Morrissey, M. B. Meta-analysis of magnitudes, differences and variation in evolutionary  
299 parameters. *Journal of Evolutionary Biology* **29**, 1882-1904 (2016).

- 300 41 Stinchcombe, J. R., Agrawal, A. F., Hohenlohe, P. A., Arnold, S. J. & Blows, M. W. Estimating  
301 nonlinear selection gradients using quadratic regression coefficients: double or nothing?  
302 *Evolution: International Journal of Organic Evolution* **62**, 2435-2440 (2008).
- 303 42 Lewandowski, D., Kurowicka, D. & Joe, H. Generating random correlation matrices based on  
304 vines and extended onion method. *Journal of multivariate analysis* **100**, 1989-2001 (2009).
- 305 43 Lande, R. Genetic variation and phenotypic evolution during allopatric speciation. *The*  
306 *American Naturalist* **116**, 463-479 (1980).
- 307 44 Hansen, T. F. & Houle, D. Measuring and comparing evolvability and constraint in  
308 multivariate characters. *Journal of Evolutionary Biology* **21**, 1201-1219, doi:10.1111/j.1420-  
309 9101.2008.01573.x (2008).
- 310 45 Kirkpatrick, M. Patterns of quantitative genetic variation in multiple dimensions. *Genetica*  
311 **136**, 271-284, doi:10.1007/s10709-008-9302-6 (2009).
- 312 46 Nakagawa, S. & Santos, E. S. Methodological issues and advances in biological meta-analysis.  
313 *Evolutionary Ecology* **26**, 1253-1274 (2012).
- 314 47 Bates, D., Mächler, M., Bolker, B. & Walker, S. Fitting linear mixed-effects models using lme4.  
315 *arXiv preprint arXiv:1406.5823* (2014).
- 316 48 Zar, J. H. *Biostatistical Analysis*. 4th edn, (Pearson Education, Inc., 1999).
- 317 49 Weisberg, M. & Reisman, K. The robust Volterra principle. *Philosophy of science* **75**, 106-131  
318 (2008).

### **Acknowledgements:**

The authors thank A.J. Wilson and B. de Bivort for helpful conversations. This work was supported by US NSF IOS grant 1557951 to N.A.D.

### **Author Contributions:**

NAD conceived of the project and developed the first version of the model. BK collected published **G** matrices and calculated matrix summary estimates. RR contributed to model development and analyses as well as article screening. DAR contributed to model development and developed the parameter exploration scheme. All authors contributed to the writing of the manuscript.

320  
321  
322  
323  
324  
325  
326  
327  
328  
329  
330  
331  
332  
333  
334  
335

## Supplementary Materials for

### **Drift on holey landscapes as a dominant evolutionary process**

Ned A. Dochtermann, Brady Klock, Derek A. Roff, & Raphaël Royauté

Correspondence to: [ned.dochtermann@gmail.com](mailto:ned.dochtermann@gmail.com)

**This PDF file includes:**

- Materials and Methods
- Supplemental Results
- Figs. S1 to S9
- Tables S1 to S10

## Materials and Methods

### 336 Simulation Models

#### 337 *Model Construction*

338 We developed an individual variance components model Fig S1; sensu <sup>33</sup> wherein  
339 individuals had phenotypes comprised of 10 traits ( $k$ ) and with each trait being highly  
340 heritable ( $h^2 = 0.8$ ) and initial genetic covariances between traits of 0. A high heritability  
341 was initially used to reduce the number of generations needed to determine the response  
342 of populations to selection. Genetic covariances were set to an initial value of zero to  
343 simulate a population under linkage equilibrium. Viability selection was applied based on  
344 fitness, which was determined either by location on a ten-dimensional holey landscape or  
345 on simple Gaussian landscapes with a single optimum per trait pair.

#### 346 *Holey Landscapes*

347 For simulations evaluating holey landscapes, we simulated populations in which traits  
348 were inherited as though continuous but expressed categorically as one of two phenotypic  
349 variants (e.g. phenotype 0 versus 1 for trait 1). Specifically, at the start of simulations, we  
350 drew genotypes for each individual from a normal distribution with a mean of zero and  
351 standard deviation of 1. To these normally distributed genotypes, we added  
352 “environmental” values ( $\mu = 0$ , all covariances = 0) to generate a phenotype with a  
353 heritability of 0.8. These continuously distributed phenotypic values were then  
354 transformed as one implementation of the holey landscape is based on the fitness of  
355 specific and discrete *combinations*. Specifically, the continuously distributed values were  
356 transformed to be a phenotype of 0 or 1, with a genotype  $< 0$  being “0” and a genotype  $> 0$   
357 being “1” (Table S1).

358 The holey landscape for a specific simulation was then constructed by randomly  
359 assigning a fitness of 0 or 1 to the 1024 possible phenotypes ( $2^k$ ) trait combinations based  
360 on the parameter  $p$ . “ $p$ ” was the probability that a trait combination had a fitness of 1 and  
361 corresponds to Gavrilets’ (2004) percolation parameter. We used three values of  $p$  in our  
362 simulation ranging from weak ( $p = 0.2$ ), moderate ( $p = 0.5$ ) and high ( $p = 0.8$ ).  $p$  can vary  
363 between 0 and 1, with values of 1 corresponding to a landscape where all trait  
364 combinations are viable and have a fitness of 1. As  $p$  approaches 0, few trait combinations  
365 are viable.

366 After the first generation, genotypes were drawn from a multivariate normal  
367 distribution based on the means and genetic variance-covariance matrix of the population  
368 that survived selection. Environmental contributions again had an average of 0 and no  
369 environmental correlation with a variance set to keep heritability at 0.8 (or other values  
370 during parameter exploration, below). The resulting phenotypic values were then

371 converted to 0's and 1's as above. This approach to generating subsequent generations  
 372 follows the structure of individual variance components models described by Roff<sup>33</sup>. We  
 373 used this individual variance components approach rather than an agent-based approach  
 374 as the latter combined with the computational requirements of matching phenotypes to  
 375 fitness under the holey landscape model was not amenable to simulation analysis.

Table S1. Example conversion of an underlying genotype to a phenotype under the two modelling scenarios. The same individual has a genotypic value for each of the 10 traits simulated (e.g. -0.918 for trait 10). To this, “environmental” contributions are added, taking heritability to 0.8. For Holey Landscape simulations, these phenotypic values are then converted to either 0 or 1 based on whether the phenotype is negative or positive.

|                              | Trait |        |       |       |        |       |        |        |        |        |
|------------------------------|-------|--------|-------|-------|--------|-------|--------|--------|--------|--------|
|                              | 1     | 2      | 3     | 4     | 5      | 6     | 7      | 8      | 9      | 10     |
| Genotype                     | 0.008 | 0.770  | 0.477 | 0.112 | -0.512 | 0.751 | -1.752 | -0.944 | 0.030  | -0.918 |
| Environmental Contribution   | 0.402 | -0.221 | 0.023 | 0.053 | 0.082  | -0.25 | 0.63   | 0.285  | -0.007 | 0.271  |
| Holey Landscape Phenotype    | 1     | 1      | 1     | 1     | 0      | 1     | 0      | 0      | 1      | 0      |
| Gaussian Landscape Phenotype | 0.410 | 0.549  | 0.500 | 0.165 | -0.430 | 0.501 | -1.122 | -0.659 | 0.023  | -0.647 |

### 376 *Gaussian (Wrightian) adaptive landscapes*

377 For simulations evaluating Gaussian landscapes, we generated genotypes and phenotypes  
 378 as above but without the categorical conversion (Table S1). We then generated random  
 379 landscapes such that the optima ( $\theta$ ) for all traits was set to zero. The topography of the  
 380 landscape for each pair of traits (e.g.  $\omega_{i,j}$ ) was defined as  $\begin{bmatrix} 1 & \omega_{i,j} \\ \omega_{i,j} & 1 \end{bmatrix}$  consistent with  
 381 previous simulation studies examining the evolution of quantitative traits reviewed by<sup>3</sup>.  
 382 This approach corresponds to single peak landscapes in any two dimensions. The forty-five  
 383  $\omega_{ij}$  values that fully describe the landscape were generated using the LKJ onion method for  
 384 constructing random correlation matrices with a pseudo-normal distribution of  
 385 correlations where the average correlation is 0 ( $\eta = 1$ ; Lewandowski et al. 2009; Fig S2).  
 386 Using the LKJ onion method ensures that the full description of the landscape ( $\omega$ ) is  
 387 positive semi-definite with feasible partial correlations. We then calculated each  
 388 individual's fitness based on a Gaussian surface<sup>43</sup>:

389 
$$w_h = \exp(-.5(z_h - \theta)^T \omega^{-1} (z_h - \theta))$$

390 where  $w_h$  is the fitness of individual  $h$ ,  $z_h$  is a vector of the observed phenotypic values for  
391 individual  $h$ ,  $\omega$  is the selection surface, and  $\theta$  is the optima for traits (0). Truncation  
392 selection was applied based on fitness, with the 50% of individuals possessing the highest  
393 fitness surviving (main results). In an additional set of simulations, stronger truncation  
394 selection was applied and only 10% of the population survived.

395 Following selection in either framework, the next generation was constructed using  
396 an individual variance components approach<sup>33</sup>. Specifically, the next generation was  
397 generated as described above based on the trait means, variances and covariances of  
398 survivors. Selection therefore acted via changes in means and variances and drift during  
399 the selection simulations was due to sampling error from the selection shaped phenotypic  
400 distributions.

#### 401 *Drift alone*

402 For populations evolving via drift alone phenotypes were generated as for Gaussian  
403 adaptive landscapes. Composition of subsequent generations was likewise generated based  
404 on the means and variances of the prior generation, without selection. The drift model  
405 therefore was simply a model of sampling error.

406 Each of five modeling scenarios (simple landscapes, drift alone, three Holey  
407 landscapes with  $p = 0.2, 0.5, \text{ or } 0.8$ ) was simulated 250 times for populations of 7500  
408 individuals and for 100 generations for each population. All modeling code is available at  
409 <https://github.com/DochtermannLab/Wright vs Holey>.

#### 410 *Statistical Comparison of Evolutionary Metrics*

411 To clarify differences in evolutionary outcomes across modeling scenarios, we summarized  
412 evolutionary outcomes at the level of  $\mathbf{G}$  matrices based on several metrics:

- 413 1.  $\lambda_2/\lambda_1$ ; results for this metric are presented in the main text
- 414 2.  $\lambda_1/\sum \lambda$ ; this is a commonly used summary value and represents the proportion of  
415 variation captured by dominant eigenvalue. This can be interpreted as the  
416 proportion variation in the main dimension of covariance
- 417 3.  $\sum \lambda$ ; matrix trace, the total variation present. For simulations this is informative as  
418 to whether a particular process results in the loss of more or less variation
- 419 4.  $\bar{e}$ : average evolvability across dimensions<sup>44</sup>. Evolutionary potential throughout  
420 multivariate space
- 421 5.  $\bar{a}$ : average reduction in evolvability due to trait covariance<sup>44</sup>. Can be interpreted as  
422 how constrained evolutionary responses are based on correlations. At the extreme,  
423 an average autonomy of 0 would indicate absolute constraints on responses to



424 selection and an average autonomy of 1 indicates evolutionary independence.  
425 Values between 0 and 1 represent quantitative constraints.

426 We compared these metrics across drift, Gaussian, and holey landscape simulations,  
427 following the main text, based on ANOVA followed by post-hoc comparisons based on  
428 calculation of Tukey's Honest Significant Differences (HSD).

#### 429 *Post-hoc Parameter Exploration*

430 The above modeling scenarios were used for our overall general analyses and for  
431 comparison to observed values. However, to explore whether our modeling outcomes were  
432 due to fundamentally different and generalizable outcomes or instead emerged from  
433 peculiarities of initial parameters, we expanded our analyses in two ways.

434 First, in addition to the moderate/weak strength of truncation selection modeled  
435 above (0.5), we also modeled stronger selection where only 10% of individuals survived.  
436 For this stronger strength of selection we again conducted 250 simulations of 7500  
437 individuals for 100 generations. These simulations were included in the above analyses.

438 Second, to more broadly examine the sensitivity of our results to different starting  
439 values, we conducted simulation studies for our selection model, our model of drift, and  
440 our model of evolution on flat holey landscapes. For each modeling scenario (Gaussian  
441 surfaces, drift, Holey landscapes) we conducted 1000 simulations where both the  
442 magnitude of initial genetic variation in each trait varied and  $h^2$  varied ( $h^2$  was defined  
443 independently). For each scenario we then explored how other changes in starting  
444 parameters affected the eigenstructure of  $\mathbf{G}$  (Table S2).

445 We then quantitatively assessed the relevance of each varied parameter on  $\lambda_2/\lambda_1$ —  
446 within modeling scenario—using linear models. All two-way interactions were included in  
447 analyses and variables (model parameters) were mean centered but unscaled. We then  
448 qualitatively compared  $\lambda_2/\lambda_1$  across modeling scenarios based on heat plots.

449 Table S2. Parameters varied across simulation iterations by modeling scenario and range of  
450 possible values

| Modeling Scenario | Parameter varied                    | Parameter values                                                                                                |
|-------------------|-------------------------------------|-----------------------------------------------------------------------------------------------------------------|
| Gaussian surfaces | Genetic variation present in traits | Single trait variabilities were independently drawn from uniform distributions ranging from 0.1 to 1.9.         |
|                   | Correlations among traits           | Initial genetic correlations were drawn according to the LKJ onion method <sup>42</sup> with $\eta = 1$ .       |
|                   | $h^2$                               | Heritabilities were drawn from a uniform distribution ranging from 0.01 to 0.99                                 |
|                   | Selection strength                  | Proportion of individuals surviving to reproduce was drawn from a uniform distribution ranging from 0.1 to 0.9. |
| Drift             | Genetic variation present in traits | Single trait variabilities were independently drawn from uniform distributions ranging from 0.1 to 1.9.         |
|                   | Correlations among traits           | Initial genetic correlations were drawn according to the LKJ onion method <sup>42</sup> with $\eta = 1$ .       |
|                   | $h^2$                               | Heritabilities were drawn from a uniform distribution ranging from 0.01 to 0.99                                 |
| Holey landscapes  | Genetic variation present in traits | Single trait variabilities were independently drawn from uniform distributions ranging from 0.1 to 1.9.         |
|                   | Correlations among traits           | Initial genetic correlations were drawn according to the LKJ onion method <sup>42</sup> with $\eta = 1$ .       |
|                   | $h^2$                               | Heritabilities were drawn from a uniform distribution ranging from 0.01 to 0.99                                 |
|                   | $p$                                 | Proportion of inviable phenotypes, Gavrillets' percolation parameter                                            |

451 Empirically Estimated **G** Matrices

452 *Observed patterns of multivariate genetic variation*

453 We conducted a literature review with Web of Science to search the journals American Naturalist,  
454 Ecology and Evolution, Evolution, Evolutionary Applications, Evolutionary Ecology, Genetics,  
455 Heredity, Journal of Evolutionary Biology, Journal of Heredity, Nature Ecology and Evolution, and  
456 the Proceedings of the Royal Society (B). These journals were searched using the terms "G matrix"  
457 on 14 May 2019, yielding a total of 272 articles. Each article was reviewed to determine if the  
458 article met inclusion criteria. Our inclusion criteria were:

- 459 1. A **G** matrix must have been estimated for more than 2 traits (i.e.  $> 2 \times 2$ )
- 460 2. Must have been reported as variances and covariances (i.e. not genetic correlations)
- 461 3. Must not have been estimated for humans.

462 Based on these inclusion criteria, we ended up with 181 estimated **G** matrices (Fig S3). For each  
463 published **G** matrix, we calculated  $\lambda_2/\lambda_1$  using a purpose-built R Shiny App ([link](#)).

464 For each estimate we recorded the paper from which it was drawn (recorded as a unique  
465 study ID), taxonomic information (Kingdom through species epithet), trait category (life-history,

466 physiology, morphology, behavior or mixed), the number of traits in the matrix,  $\lambda_1$ ,  $\lambda_2$ ,  $\lambda_2/\lambda_1$ ,  
467 number of dimensions <sup>45</sup>, number of dimensions divided by the number of traits, and all  
468 bibliographic information.

#### 469 *Phylogenetic Signal in $\lambda_2/\lambda_1$*

470 To test for phylogenetic signal we fit a simple taxonomic mixed-effects model. This modeling  
471 approach incorporates the hierarchical non-independence due to taxonomic relationships but does  
472 not require a full phylogeny <sup>46</sup>. Essentially, at each node of a phylogeny, relationships are modeled  
473 according to a star relationship. Each taxonomic grouping was included as a random effect, as was  
474 study ID, and the resulting model fit with the `lme4` package in R <sup>47</sup>. From this model we estimated  
475 phylogenetic signal as the proportion of variation attributable to taxonomy, the variation  
476 attributable to study ID, and the residual variance. Confidence intervals were then estimated based  
477 on likelihood profile likelihoods.

#### 478 *Comparison of Observed Results to Simulation Results*

479 Finally, we compared the observed values to the average for each of the simulation using the  
480 intercept coefficient of the above linear model. For this,  $t$  was calculated as <sup>48</sup>:

$$481 \quad t = \frac{\hat{\beta} - \beta_{H_0}}{s.e.(\hat{\beta})}$$

482 where  $\hat{\beta}$  was the estimated intercept from the taxonomic model (above) and  $\beta_{H_0}$  was a simulation  
483 average.  $p$  was calculated with degrees of freedom estimated using Satterthwaite's method ( $df =$   
484  $17.275$ ).

## 485 **Supplemental Results**

### 486 Simulation Models

#### 487 *Statistical Comparison of Evolutionary Metrics*

488 Populations that evolved on different landscapes (drift alone, Gaussian, or holey)  
489 significantly differed from each other in the structure of **G** after 100 generations (Tables S3  
490 – S7). Holey landscapes were characterized by a compression of most variation into the  
491 dominant dimension in multivariate space (Tables S3 & S4; Figures 2 & S5). Populations  
492 evolving on Gaussian landscapes were characterized by a drastic reduction in the total  
493 variation present, which was also reflected in reduced evolvability (Tables S6 & S7; Figures  
494 S5 & S6). The combination of high standing genetic variation and this variation being  
495 distributed across dimensions led to populations that evolved solely due to drift to exhibit  
496 significantly greater autonomy than observed in any of the other modeling scenarios (Table  
497 S7; Figure S8). This greater constraint in populations evolving on either Gaussian or holey  
498 landscapes is likely due to the loss of variation for populations evolving on Gaussian

499 landscapes (Figures S6 & S7) and the compression of variation for populations evolving on  
 500 holey landscapes (Figures 2 & S5).  
 501

502 Table S3. ANOVA and Tukey HSD results for  $\lambda_2/\lambda_1$ . Significantly greater genetic variation  
 503 was maintained across all dimensions when populations evolved on Gaussian landscapes  
 504 or due to drift than when evolving on holey landscapes (Figure 2, main text).

| ANOVA Results               |            |        |        |       |       |
|-----------------------------|------------|--------|--------|-------|-------|
|                             | df         | SS     | MSS    | F     | p     |
| Simulation type             | 5          | 54.98  | 10.996 | 343.5 | <0.01 |
| Residual                    | 1494       | 47.82  | 0.032  |       |       |
| Tukey HSD                   |            |        |        |       |       |
| Simulation Comparison       | Difference | Lower  | Upper  | p     |       |
| Holey p = 0.5-Holey p = 0.2 | -0.026     | -0.071 | 0.020  | 0.589 |       |
| Holey p = 0.8-Holey p = 0.2 | 0.011      | -0.035 | 0.057  | 0.984 |       |
| Wright 0.1-Holey p = 0.2    | 0.293      | 0.248  | 0.339  | <0.01 |       |
| Wright 0.5-Holey p = 0.2    | 0.374      | 0.329  | 0.420  | <0.01 |       |
| Drift-Holey p = 0.2         | 0.437      | 0.391  | 0.483  | <0.01 |       |
| Holey p = 0.8-Holey p = 0.5 | 0.037      | -0.009 | 0.082  | 0.198 |       |
| Wright 0.1-Holey p = 0.5    | 0.319      | 0.273  | 0.365  | <0.01 |       |
| Wright 0.5-Holey p = 0.5    | 0.400      | 0.354  | 0.446  | <0.01 |       |
| Drift-Holey p = 0.5         | 0.463      | 0.417  | 0.508  | <0.01 |       |
| Wright 0.1-Holey p = 0.8    | 0.282      | 0.237  | 0.328  | <0.01 |       |
| Wright 0.5-Holey p = 0.8    | 0.363      | 0.318  | 0.409  | <0.01 |       |
| Drift-Holey p = 0.8         | 0.426      | 0.380  | 0.472  | <0.01 |       |
| Wright 0.5-Wright 0.1       | 0.081      | 0.035  | 0.127  | <0.01 |       |
| Drift-Wright 0.1            | 0.144      | 0.098  | 0.189  | <0.01 |       |
| Drift-Wright 0.5            | 0.063      | 0.017  | 0.108  | <0.01 |       |

505

506

507 Table S4. ANOVA and Tukey HSD results for  $\lambda_1/\sum \lambda$ . Significantly greater proportional  
 508 genetic variation was retained in the dominant multivariate direction for populations that  
 509 evolved on Gaussian landscapes or via drift than when evolving on holey landscapes  
 510 (Figure S5).

| ANOVA Results               |            |        |        |       |       |
|-----------------------------|------------|--------|--------|-------|-------|
|                             | df         | SS     | MSS    | F     | p     |
| Simulation type             | 5          | 29.49  | 5.90   | 325.4 | <0.01 |
| Residual                    | 1494       | 27.08  | 0.02   |       |       |
| Tukey HSD                   |            |        |        |       |       |
| Simulation Comparison       | Difference | Lower  | Upper  | p     |       |
| Holey p = 0.5-Holey p = 0.2 | 0.044      | 0.010  | 0.079  | <0.01 |       |
| Holey p = 0.8-Holey p = 0.2 | 0.019      | -0.015 | 0.054  | 0.594 |       |
| Wright 0.1-Holey p = 0.2    | -0.188     | -0.223 | -0.154 | <0.01 |       |
| Wright 0.5-Holey p = 0.2    | -0.233     | -0.268 | -0.199 | <0.01 |       |
| Drift-Holey p = 0.2         | -0.320     | -0.354 | -0.285 | <0.01 |       |
| Holey p = 0.8-Holey p = 0.5 | -0.025     | -0.059 | 0.009  | 0.307 |       |
| Wright 0.1-Holey p = 0.5    | -0.232     | -0.267 | -0.198 | <0.01 |       |
| Wright 0.5-Holey p = 0.5    | -0.278     | -0.312 | -0.243 | <0.01 |       |
| Drift-Holey p = 0.5         | -0.364     | -0.398 | -0.330 | <0.01 |       |
| Wright 0.1-Holey p = 0.8    | -0.208     | -0.242 | -0.173 | <0.01 |       |
| Wright 0.5-Holey p = 0.8    | -0.253     | -0.287 | -0.218 | <0.01 |       |
| Drift-Holey p = 0.8         | -0.339     | -0.374 | -0.305 | <0.01 |       |
| Wright 0.5-Wright 0.1       | -0.045     | -0.080 | -0.011 | <0.01 |       |
| Drift-Wright 0.1            | -0.132     | -0.166 | -0.097 | <0.01 |       |
| Drift-Wright 0.5            | -0.086     | -0.121 | -0.052 | <0.01 |       |

511

512 Table S5. ANOVA and Tukey HSD results for the total genetic variation in populations at the  
 513 end of simulations  $\sum \lambda$ . The amount of total variation significantly varied across simulation  
 514 types. Populations that evolved on Gaussian landscapes lost considerably more genetic  
 515 variation than those evolving on other landscapes (Figure S6).

| ANOVA Results               |            |          |         |       |       |
|-----------------------------|------------|----------|---------|-------|-------|
|                             | df         | SS       | MSS     | F     | p     |
| Simulation type             | 5          | 357826   | 71565   | 6.23  | <0.01 |
| Residual                    | 1494       | 17167085 | 11491   |       |       |
| Tukey HSD                   |            |          |         |       |       |
| Simulation Comparison       | Difference | Lower    | Upper   | p     |       |
| Holey p = 0.5-Holey p = 0.2 | -1.050     | -28.408  | 26.308  | 1.000 |       |
| Holey p = 0.8-Holey p = 0.2 | -18.153    | -45.511  | 9.205   | 0.407 |       |
| Wright 0.1-Holey p = 0.2    | -37.651    | -65.009  | -10.293 | <0.01 |       |
| Wright 0.5-Holey p = 0.2    | -37.237    | -64.595  | -9.879  | <0.01 |       |
| Drift-Holey p = 0.2         | -27.791    | -55.149  | -0.433  | 0.044 |       |
| Holey p = 0.8-Holey p = 0.5 | -17.103    | -44.461  | 10.255  | 0.477 |       |
| Wright 0.1-Holey p = 0.5    | -36.601    | -63.959  | -9.243  | <0.01 |       |
| Wright 0.5-Holey p = 0.5    | -36.187    | -63.545  | -8.830  | <0.01 |       |
| Drift-Holey p = 0.5         | -26.741    | -54.099  | 0.617   | 0.060 |       |
| Wright 0.1-Holey p = 0.8    | -19.498    | -46.856  | 7.860   | 0.324 |       |
| Wright 0.5-Holey p = 0.8    | -19.084    | -46.442  | 8.274   | 0.348 |       |
| Drift-Holey p = 0.8         | -9.638     | -36.996  | 17.720  | 0.916 |       |
| Wright 0.5-Wright 0.1       | 0.414      | -26.944  | 27.771  | 1.000 |       |
| Drift-Wright 0.1            | 9.860      | -17.498  | 37.218  | 0.908 |       |
| Drift-Wright 0.5            | 9.446      | -17.912  | 36.804  | 0.923 |       |

516 Table S6. ANOVA and Tukey HSD results for evolvability,  $\bar{e}$ . Because more genetic variation  
 517 was maintained when populations evolved on holey landscapes or drift (Table S5),  
 518 evolvability was significantly lower when populations evolved on Gaussian landscapes  
 519 (Figure S7). (evolvability is just the matrix trace divided by the number of traits)

| ANOVA Results               |            |        |        |       |       |
|-----------------------------|------------|--------|--------|-------|-------|
|                             | df         | SS     | MSS    | F     | p     |
| Simulation type             | 5          | 3578   | 715.7  | 6.23  | <0.01 |
| Residual                    | 1494       | 171671 | 114.9  |       |       |
| Tukey HSD                   |            |        |        |       |       |
| Simulation Comparison       | Difference | Lower  | Upper  | p     |       |
| Holey p = 0.5-Holey p = 0.2 | -0.105     | -2.841 | 2.631  | 1.000 |       |
| Holey p = 0.8-Holey p = 0.2 | -1.815     | -4.551 | 0.921  | 0.407 |       |
| Wright 0.1-Holey p = 0.2    | -3.765     | -6.501 | -1.029 | <0.01 |       |
| Wright 0.5-Holey p = 0.2    | -3.724     | -6.460 | -0.988 | <0.01 |       |
| Drift-Holey p = 0.2         | -2.779     | -5.515 | -0.043 | 0.044 |       |
| Holey p = 0.8-Holey p = 0.5 | -1.710     | -4.446 | 1.025  | 0.477 |       |
| Wright 0.1-Holey p = 0.5    | -3.660     | -6.396 | -0.924 | <0.01 |       |
| Wright 0.5-Holey p = 0.5    | -3.619     | -6.355 | -0.883 | <0.01 |       |
| Drift-Holey p = 0.5         | -2.674     | -5.410 | 0.062  | 0.060 |       |
| Wright 0.1-Holey p = 0.8    | -1.950     | -4.686 | 0.786  | 0.324 |       |
| Wright 0.5-Holey p = 0.8    | -1.908     | -4.644 | 0.827  | 0.348 |       |
| Drift-Holey p = 0.8         | -0.964     | -3.700 | 1.772  | 0.916 |       |
| Wright 0.5-Wright 0.1       | 0.041      | -2.694 | 2.777  | 1.000 |       |
| Drift-Wright 0.1            | 0.986      | -1.750 | 3.722  | 0.908 |       |
| Drift-Wright 0.5            | 0.945      | -1.791 | 3.680  | 0.923 |       |

520 Table S7. ANOVA and Tukey HSD results for autonomy,  $\bar{a}$ . Significantly greater variation  
 521 was maintained across all dimensions when populations evolved on Gaussian landscapes  
 522 or due to drift than when evolving on holey landscapes (Figure S8).

| ANOVA Results               |            |        |        |       |       |
|-----------------------------|------------|--------|--------|-------|-------|
|                             | df         | SS     | MSS    | F     | p     |
| Simulation type             | 5          | 43.61  | 8.72   | 518.3 | <0.01 |
| Residual                    | 1494       | 25.14  | 0.02   |       |       |
| Tukey HSD                   |            |        |        |       |       |
| Simulation Comparison       | Difference | Lower  | Upper  | p     |       |
| Holey p = 0.5-Holey p = 0.2 | -0.021     | -0.054 | 0.012  | 0.479 |       |
| Holey p = 0.8-Holey p = 0.2 | -0.042     | -0.075 | -0.009 | <0.01 |       |
| Wright 0.1-Holey p = 0.2    | -0.148     | -0.181 | -0.115 | <0.01 |       |
| Wright 0.5-Holey p = 0.2    | 0.395      | 0.362  | 0.428  | <0.01 |       |
| Drift-Holey p = 0.2         | 0.077      | 0.044  | 0.110  | <0.01 |       |
| Holey p = 0.8-Holey p = 0.5 | -0.022     | -0.055 | 0.011  | 0.424 |       |
| Wright 0.1-Holey p = 0.5    | -0.127     | -0.160 | -0.094 | <0.01 |       |
| Wright 0.5-Holey p = 0.5    | 0.415      | 0.382  | 0.448  | <0.01 |       |
| Drift-Holey p = 0.5         | 0.098      | 0.064  | 0.131  | <0.01 |       |
| Wright 0.1-Holey p = 0.8    | -0.106     | -0.139 | -0.072 | <0.01 |       |
| Wright 0.5-Holey p = 0.8    | 0.437      | 0.404  | 0.470  | <0.01 |       |
| Drift-Holey p = 0.8         | 0.119      | 0.086  | 0.152  | <0.01 |       |
| Wright 0.5-Wright 0.1       | 0.543      | 0.509  | 0.576  | <0.01 |       |
| Drift-Wright 0.1            | 0.225      | 0.192  | 0.258  | <0.01 |       |
| Drift-Wright 0.5            | -0.318     | -0.351 | -0.285 | <0.01 |       |

523 *Post-hoc Parameter Exploration*

524 For populations evolving on Gaussian landscapes, compression of genetic variation into the  
 525 leading dimension decreased with increasing heritability and an increasing strength of  
 526 selection (Table S8, Figure S9). No two-way interaction was statistically significant. Put  
 527 another way,  $\lambda_2/\lambda_1$ , increased with heritability and the strength of selection and average  
 528  $\lambda_2/\lambda_1$  was 0.68 for average parameter values (Table S8).

529 For populations evolving solely due to drift,  $\lambda_2/\lambda_1$  increased with greater initial  
 530 total genetic variation (Table S9). However, the strength of this effect was minimal. More  
 531 dramatically,  $\lambda_2/\lambda_1$  significantly and strongly decreased with increasing average initial  
 532 absolute genetic correlation (Table S9). At the extreme,  $\lambda_2/\lambda_1$  approached 0 as the average  
 533 initial absolute correlation approaches 1. No two-way interaction was statistically  
 534 significant. Average  $\lambda_2/\lambda_1$  was 0.69 for average parameter values (Table S9).

535 When evolving on holey landscapes, and consistent with prior simulation  
 536 comparisons,  $\lambda_2/\lambda_1$  was lower for average parameter values (0.42, Table S10).  
 537 Compression into a single dimension also increased with increasing heritability and  
 538 increasing average absolute initial correlations (Table S10).

539 Genetic variation was more strongly compressed into a primary dimension when  
 540 populations evolved on holey landscapes versus when they evolved due to drift or due to  
 541 selection on Gaussian surfaces (Tables S8 – S10; Figures S9 – S11). This was a surprisingly  
 542 robust result regardless of the starting parameters of a simulation (Figures S9 – S12). This  
 543 parameter robustness<sup>49</sup> supports the generality of our modeling. Unfortunately, we were  
 544 not able to investigate other forms of robustness<sup>49</sup> due to computational limitations.

545 Table S8. Linear modeling results for Gaussian landscape parameter exploration. All  
 546 covariates were modeled while centered (but not variance standardized).

| Covariate                      | Estimate     | Standard Error | t*          | p               |
|--------------------------------|--------------|----------------|-------------|-----------------|
| Intercept (average)            | 0.680        | 0.004          | 157.94      | <0.01           |
| Total variation (tot. var)     | 0.004        | 0.003          | 1.33        | 0.182           |
| Mean  correlation  (mean cor)  | -0.256       | 0.170          | -1.51       | 0.132           |
| <b>h<sup>2</sup></b>           | <b>0.103</b> | <b>0.015</b>   | <b>6.70</b> | <b>&lt;0.01</b> |
| <b>Selection strength (ss)</b> | <b>0.069</b> | <b>0.019</b>   | <b>3.60</b> | <b>&lt;0.01</b> |
| tot.var × mean cor             | -0.070       | 0.107          | -0.66       | 0.513           |
| tot.var × h <sup>2</sup>       | -0.008       | 0.010          | -0.75       | 0.454           |
| tot.var × ss                   | 0.012        | 0.013          | 0.95        | 0.344           |
| mean cor × h <sup>2</sup>      | 0.806        | 0.601          | 1.34        | 0.180           |
| mean cor × ss                  | 0.384        | 0.733          | 0.52        | 0.600           |
| h <sup>2</sup> × ss            | -0.098       | 0.070          | -1.39       | 0.164           |

\*p values are based on this t value with 989 degrees of freedom

547 Table S9. Linear modeling results for parameter exploration of the drift model. All  
548 covariates were modeled while centered (but not variance standardized).

| Covariate                            | Estimate      | Standard Error | t*           | p               |
|--------------------------------------|---------------|----------------|--------------|-----------------|
| Intercept (average)                  | 0.689         | 0.004          | 165.12       | <0.01           |
| <b>Total variation (tot. var)</b>    | <b>0.009</b>  | <b>0.003</b>   | <b>3.62</b>  | <b>&lt;0.01</b> |
| <b>Mean  correlation  (mean cor)</b> | <b>-0.867</b> | <b>0.160</b>   | <b>-5.41</b> | <b>&lt;0.01</b> |
| h <sup>2</sup>                       | 0.004         | 0.015          | 0.27         | 0.786           |
| tot.var × mean cor                   | -0.034        | 0.103          | -0.33        | 0.740           |
| tot.var × h <sup>2</sup>             | 0.015         | 0.009          | 1.63         | 0.103           |
| mean cor × h <sup>2</sup>            | -0.209        | 0.555          | -0.38        | 0.706           |

\*p values are based on this t value with 993 degrees of freedom

549 Table S8. Linear modeling results for holey landscape parameter exploration. All covariates  
550 were modeled while centered (but not variance standardized).

| Covariate                       | Estimate      | Standard Error | t*            | p               |
|---------------------------------|---------------|----------------|---------------|-----------------|
| Intercept (average)             | 0.423         | 0.007          | 61.03         | <0.01           |
| Total variation (tot. var.)     | 0.007         | 0.004          | 1.56          | 0.119           |
| Mean  correlation  (mean cor)   | -0.195        | 0.265          | -0.74         | 0.462           |
| <b>h<sup>2</sup></b>            | <b>-0.272</b> | <b>0.024</b>   | <b>-11.22</b> | <b>&lt;0.01</b> |
| <i>p</i>                        | 0.011         | 0.024          | 0.47          | 0.640           |
| tot.var × mean cor              | 0.070         | 0.150          | 0.47          | 0.640           |
| tot.var × h <sup>2</sup>        | 0.012         | 0.015          | 0.78          | 0.435           |
| tot.var × <i>p</i>              | 0.007         | 0.015          | 0.48          | 0.631           |
| mean cor × h <sup>2</sup>       | 0.547         | 0.940          | 0.58          | 0.561           |
| mean cor × <i>p</i>             | -0.239        | 0.941          | -0.26         | 0.799           |
| <b>h<sup>2</sup> × <i>p</i></b> | <b>-0.593</b> | <b>0.086</b>   | <b>-6.93</b>  | <b>&lt;0.01</b> |

\*p values are based on this t value with 989 degrees of freedom



551 Empirically Estimated G Matrices

552 *Phylogenetic Signal in  $\lambda_2/\lambda_1$*

553 Table S9. Variances for  $\lambda_2/\lambda_1$ —with associated 95% confidence intervals—at each  
 554 taxonomic level, for study ID, and residual. Proportion of variation for taxonomy, study ID,  
 555 and residual are also provided

| Variance component | Estimate (95% CI)     | Proportion of variance |
|--------------------|-----------------------|------------------------|
| Study ID           | 0.026 (0.013 : 0.048) | 0.45                   |
| Taxonomy           | 0.003                 | 0.05                   |
| species            | 0 (0 : 0.01)          |                        |
| Genus              | 0 (0 : 0.016)         |                        |
| Family             | 0.003 (0 : 0.02)      |                        |
| Order              | 0 (0 : 0.018)         |                        |
| Class              | 0 (0 : 0.008)         |                        |
| Phylum             | 0 (0 : 0.007)         |                        |
| Kingdom            | 0 (0 : 0.011)         |                        |
| Residual           | 0.029 (0.023 : 0.037) | 0.50                   |

556 *Comparison of Observed Results to Simulation Results*

557 Observed results did not significantly differ from simulated populations that evolved on holey  
 558 landscapes (Figure 2; Table S10).

559 Table S10. t values and associated p values for the comparison of the observed average of  $\lambda_2/\lambda_1$   
 560 versus the average  $\lambda_2/\lambda_1$  for each set of simulations. The observed average and its standard error  
 561 was taken from a taxonomic mixed-effects model.

| Average observed $\lambda_2/\lambda_1$ | Simulation                      | Simulation average $\lambda_2/\lambda_1$ | t       | p     |
|----------------------------------------|---------------------------------|------------------------------------------|---------|-------|
|                                        | Holey (p = 0.2)                 | 0.357                                    | 0.320   | 0.753 |
|                                        | Holey (p = 0.5)                 | 0.331                                    | 1.199   | 0.247 |
| 0.366 vs:<br>(se: 0.03)                | Holey (p = 0.8)                 | 0.368                                    | -0.050  | 0.961 |
|                                        | Gaussian<br>(surv. prob. = 0.1) | 0.650                                    | -9.66   | <0.01 |
|                                        | Gaussian<br>(surv. prob. = 0.5) | 0.731                                    | -12.416 | <0.01 |
|                                        | Drift                           | 0.794                                    | -14.552 | <0.01 |

\* degrees of freedom = 17.275

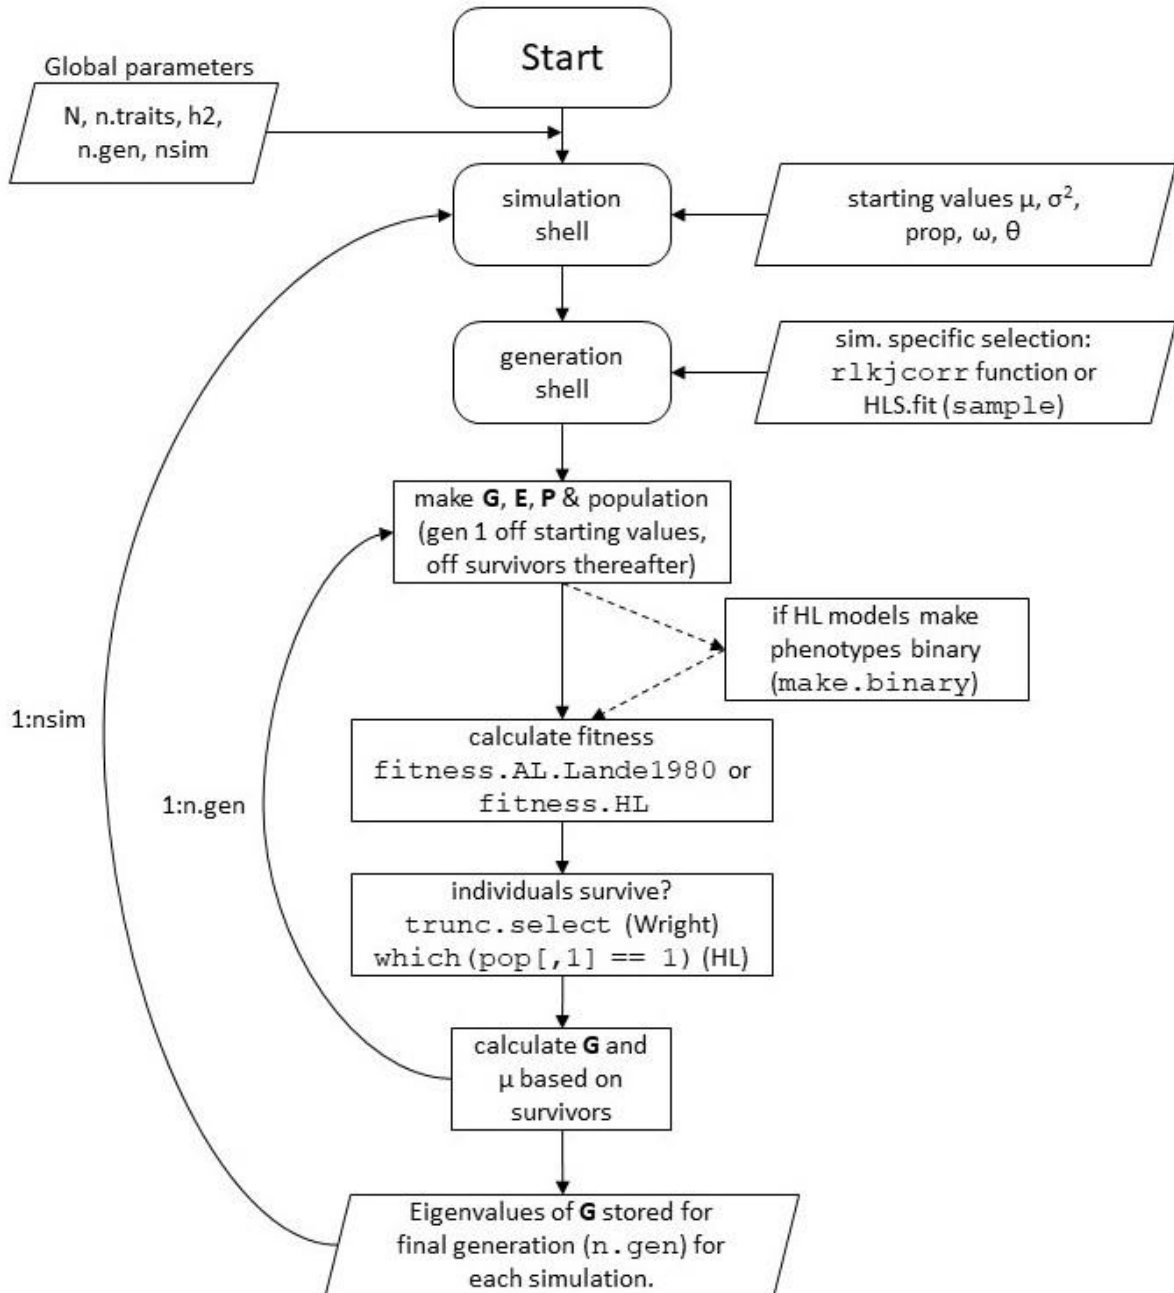

562 Figure S1. Model flow diagram for HL and gaussian landscapes

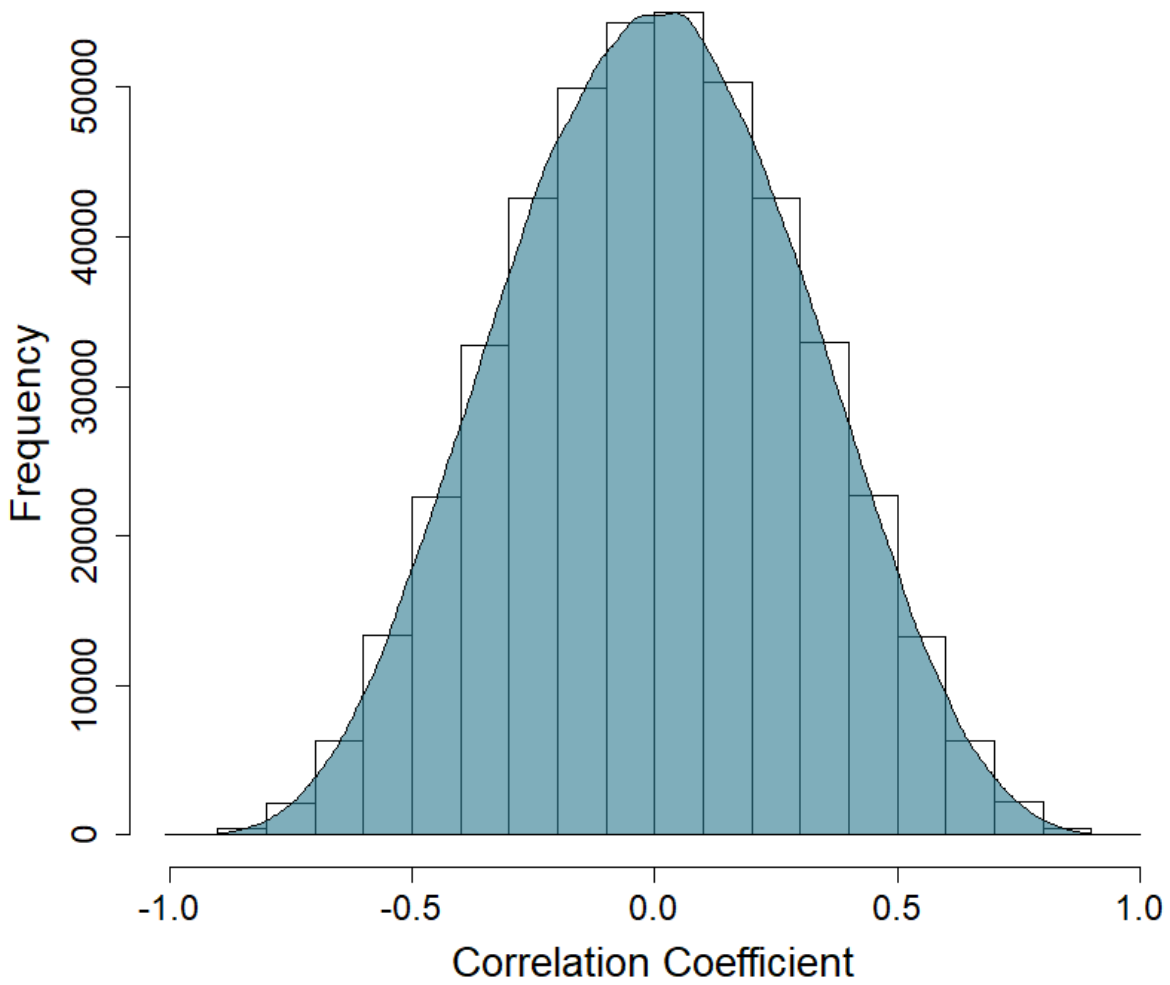

563 Figure S2. Distribution of 450000 random correlations generated using the LKJ Onion method with  
564  $k = 10$ .

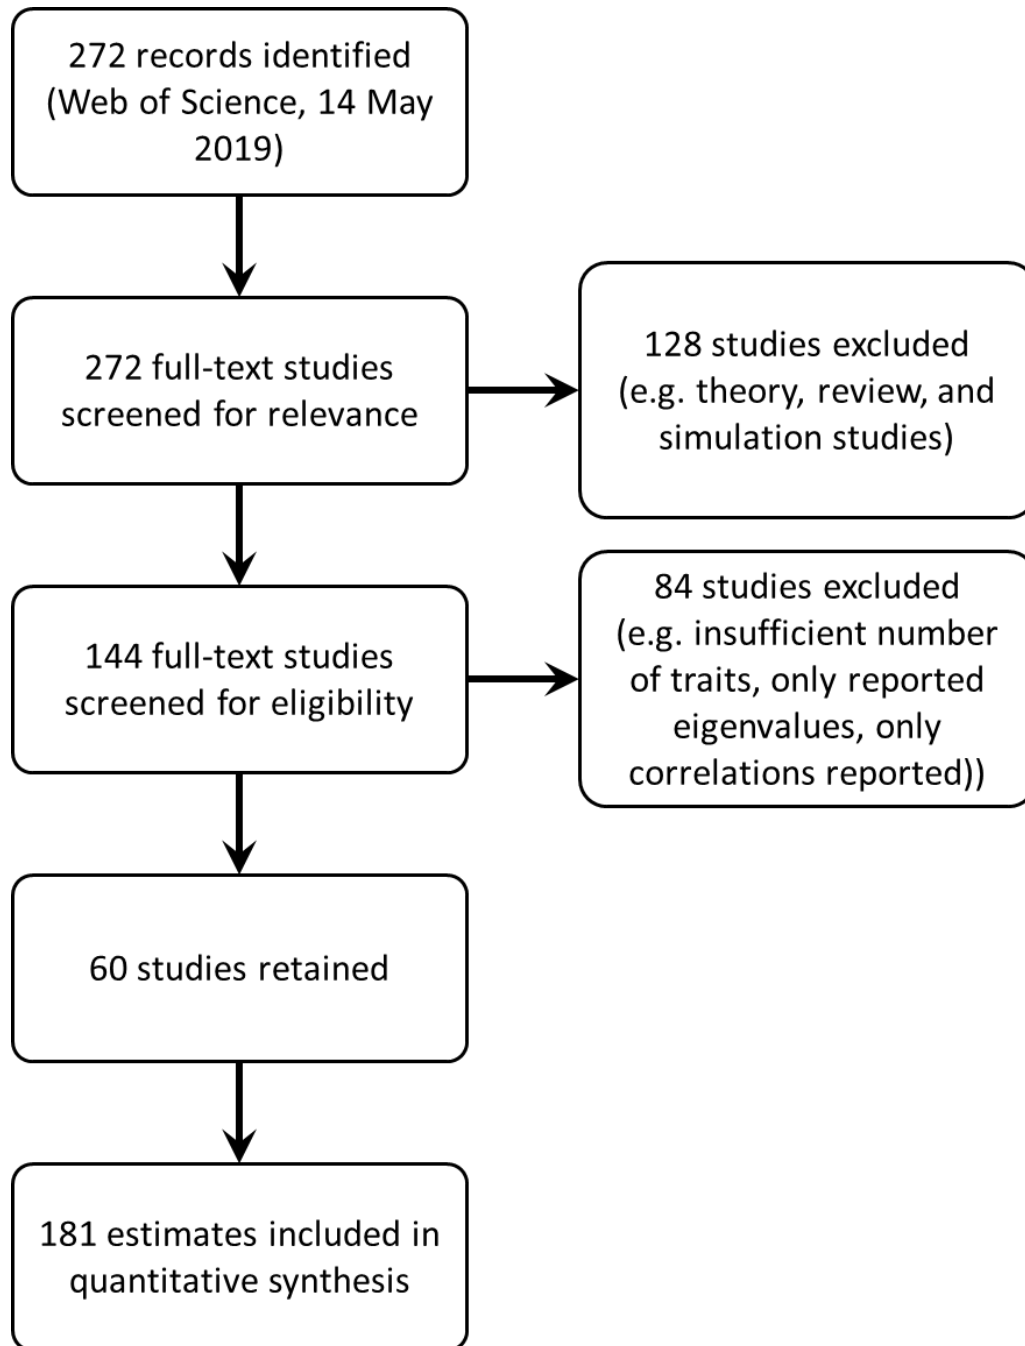

565 Figure S3. PRISMA diagram for studies and estimates included in taxonomic analyses.

566

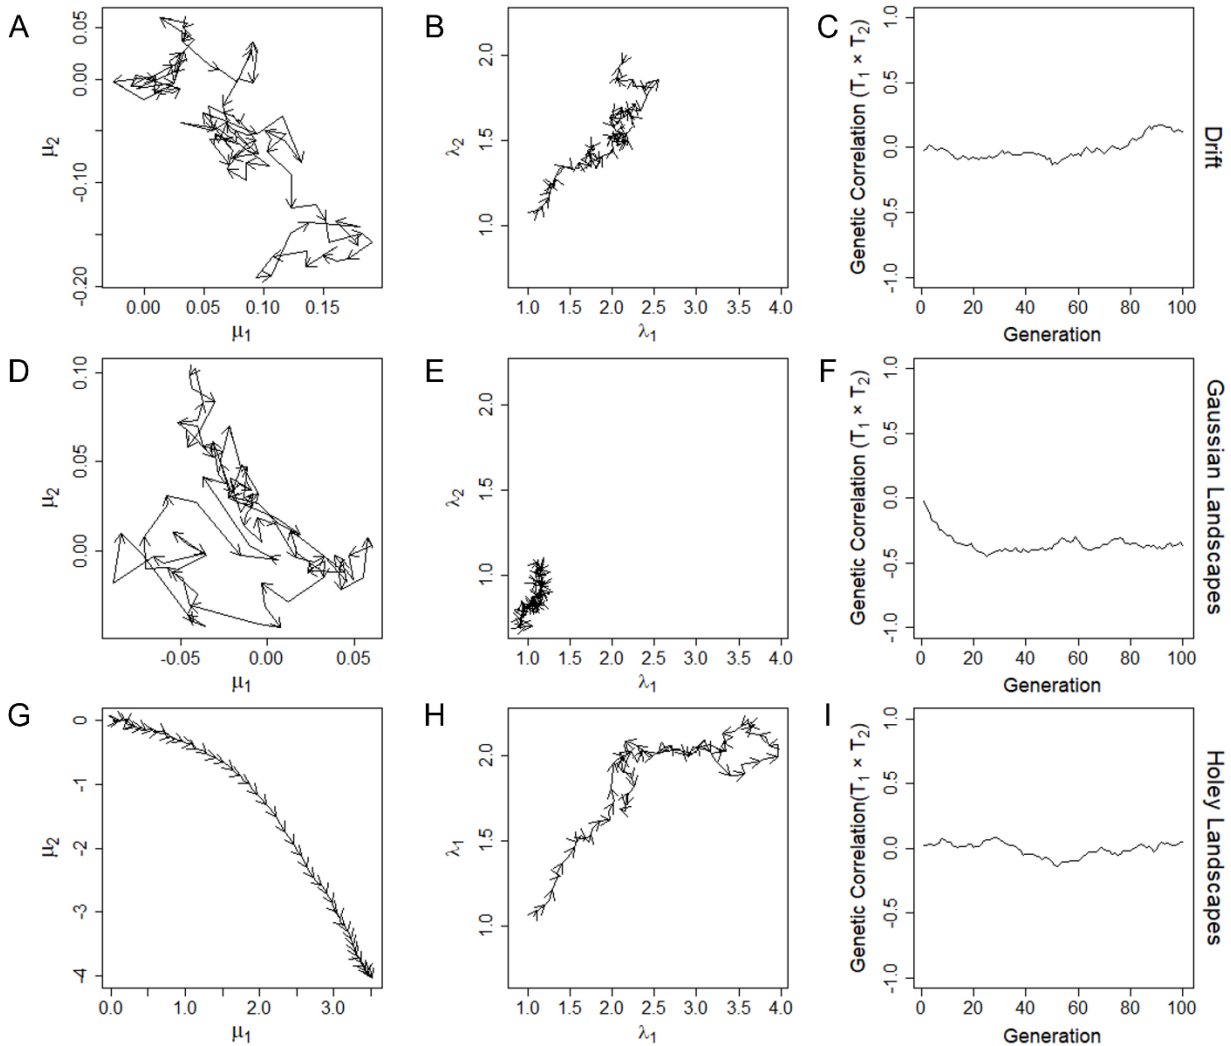

567

568 Figure S4. Single population comparisons of population evolution over 100 generations under drift  
 569 (A – C), on a Gaussian landscape (D – F), and on a holey landscape (G – I). Arrow heads in A, B,  
 570 G, and H indicate the direction of evolutionary change at every second generation. Evolutionary  
 571 change in the average values for traits 1 and 2 (A, D, and G; note the different scales for axes) show  
 572 little change for either drift and on a Gaussian landscape. In contrast, the population shows  
 573 substantial and directional change in trait values on a holey landscape (G). This suggests the  
 574 population is moving between holes in G but is restricted to a local optimum in D. The first and  
 575 second eigenvalues ( $\lambda_1$  &  $\lambda_2$ ) show little total change due to drift (B), consistent decreases on a  
 576 Gaussian landscape (E), and larger changes—including overall increases—on a holey landscape (H).  
 577 This is consistent with the overall compression of variance reported elsewhere in the main and  
 578 supplemental results. The bivariate genetic correlation between the first two traits shows little  
 579 directional change under either drift or on holey landscapes (C and I) but rapid absolute increase  
 580 followed by becoming static on a Gaussian landscape (F). As was the case for eigenvalues (E), this is  
 581 consistent with stabilizing selection at a local optimum. These results are consistent across multiple  
 582 runs, though exact trajectories vary and the sign of genetic correlations is equally likely to be  
 583 positive as negative.

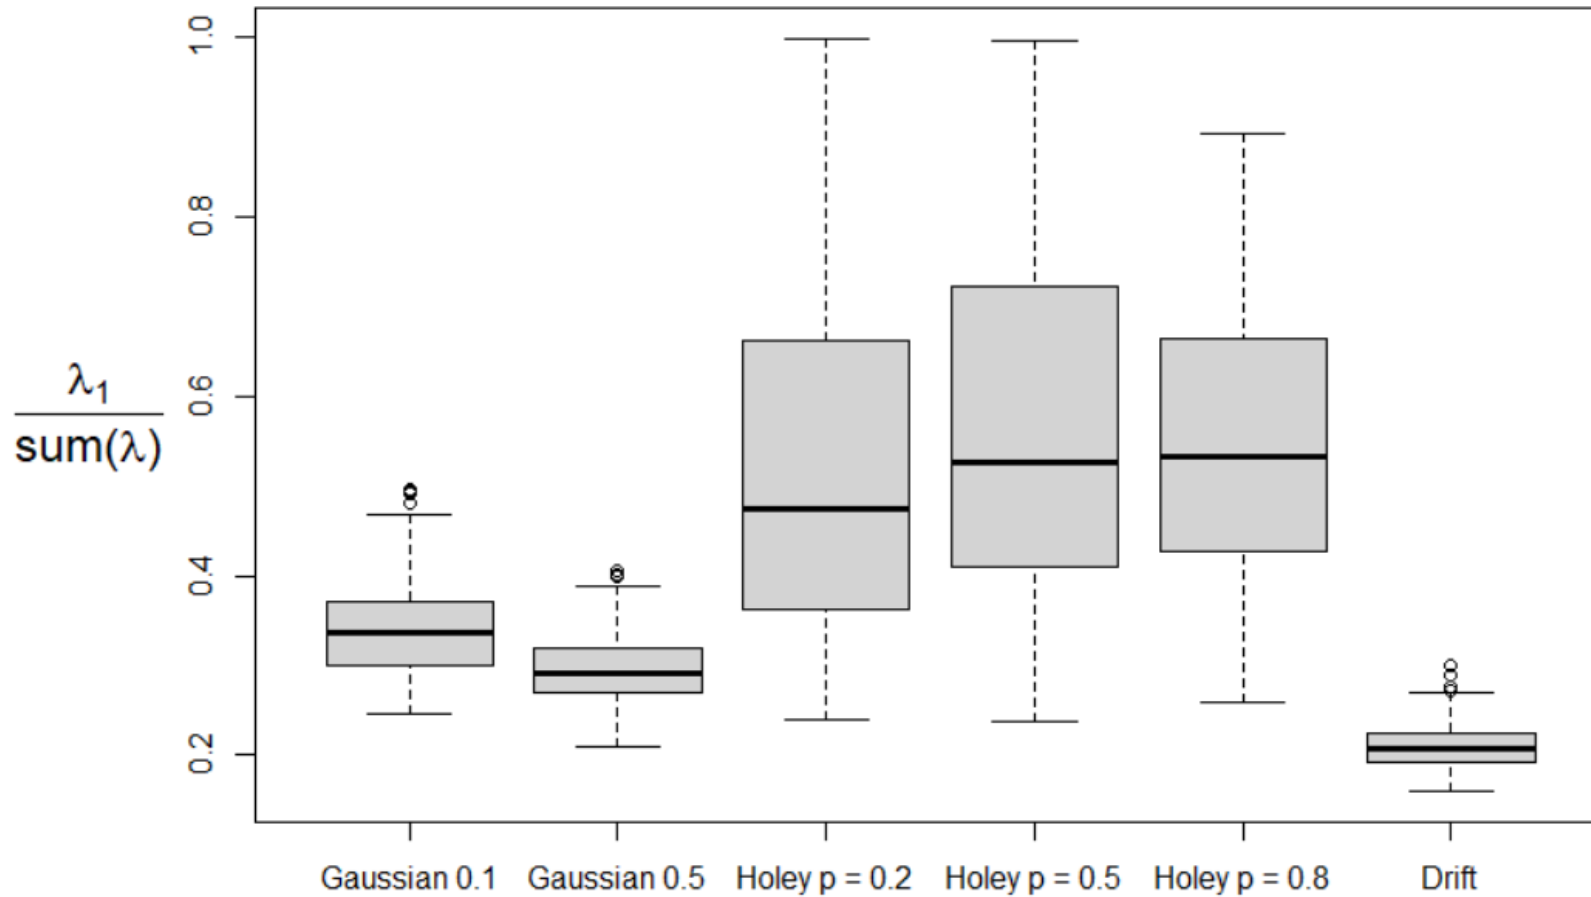

584 Figure S5. Variation was more evenly distributed across dimensions when populations evolved on Gaussian landscapes or due solely to  
 585 drift. Consequently, less total variation was present in the first dimension (Table S4).

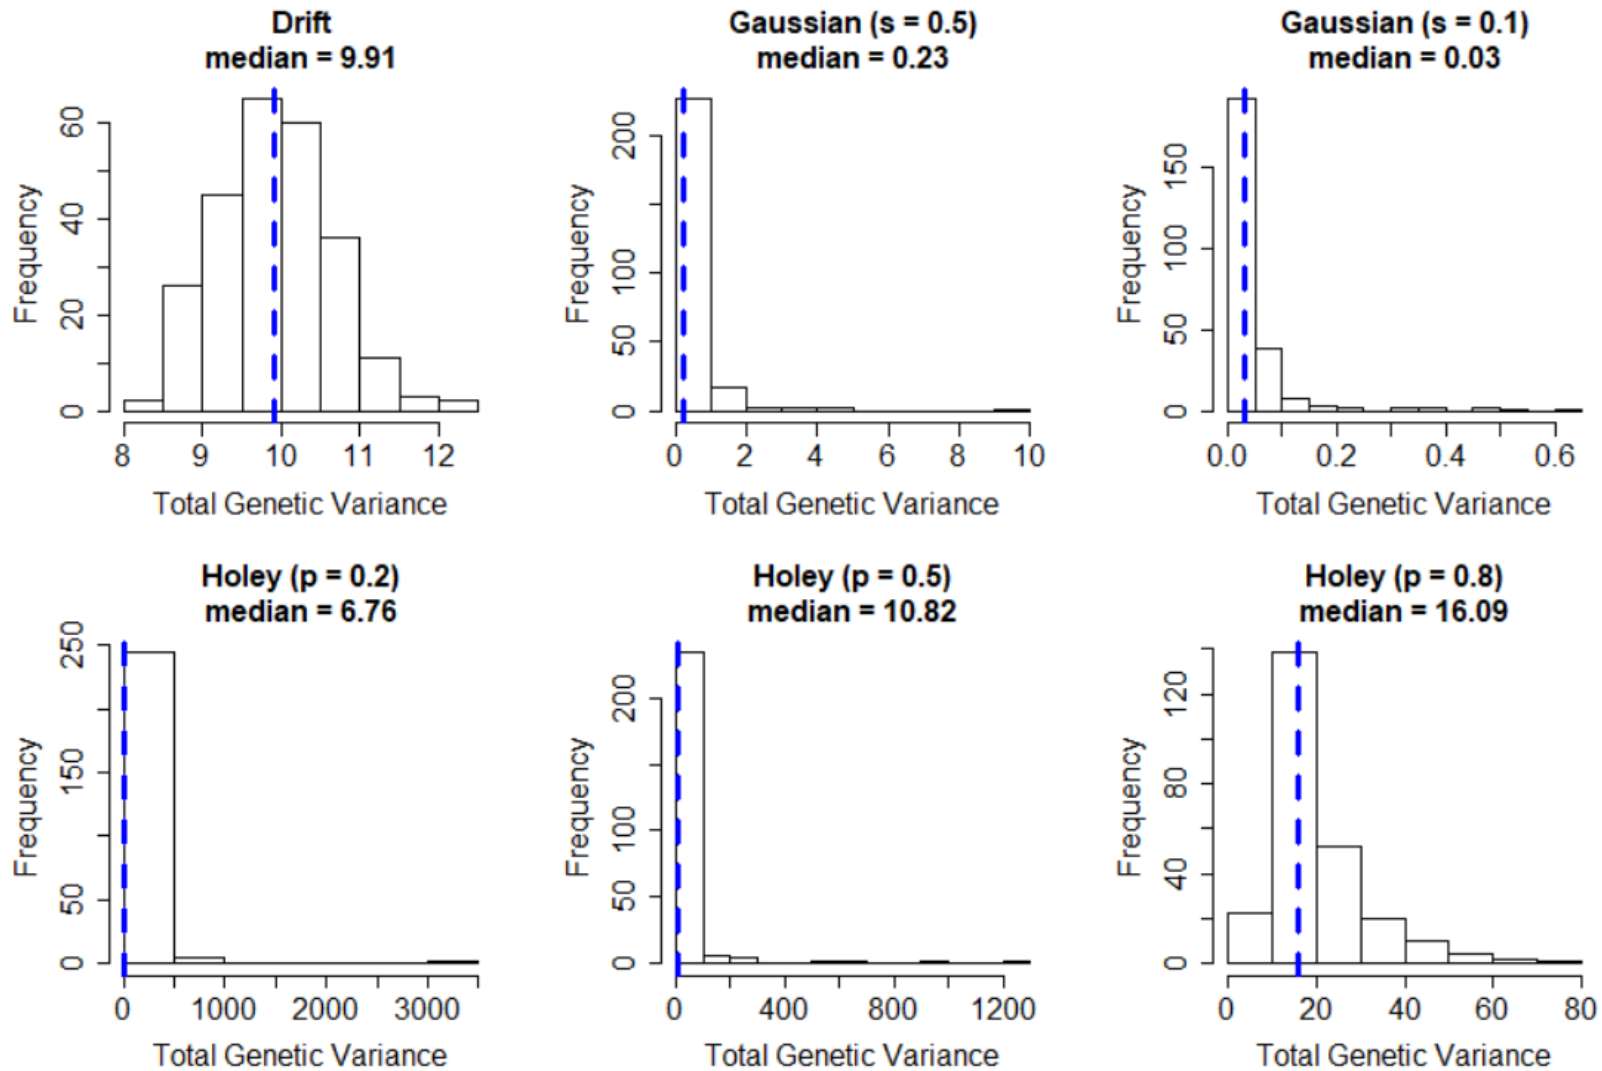

586 Figure S6. The total genetic variation present after 100 generations in each of six modeling conditions and across 250 simulations.  
 587 Selection on Gaussian surfaces led to a significant reduction in the amount of variation present (Table S5).

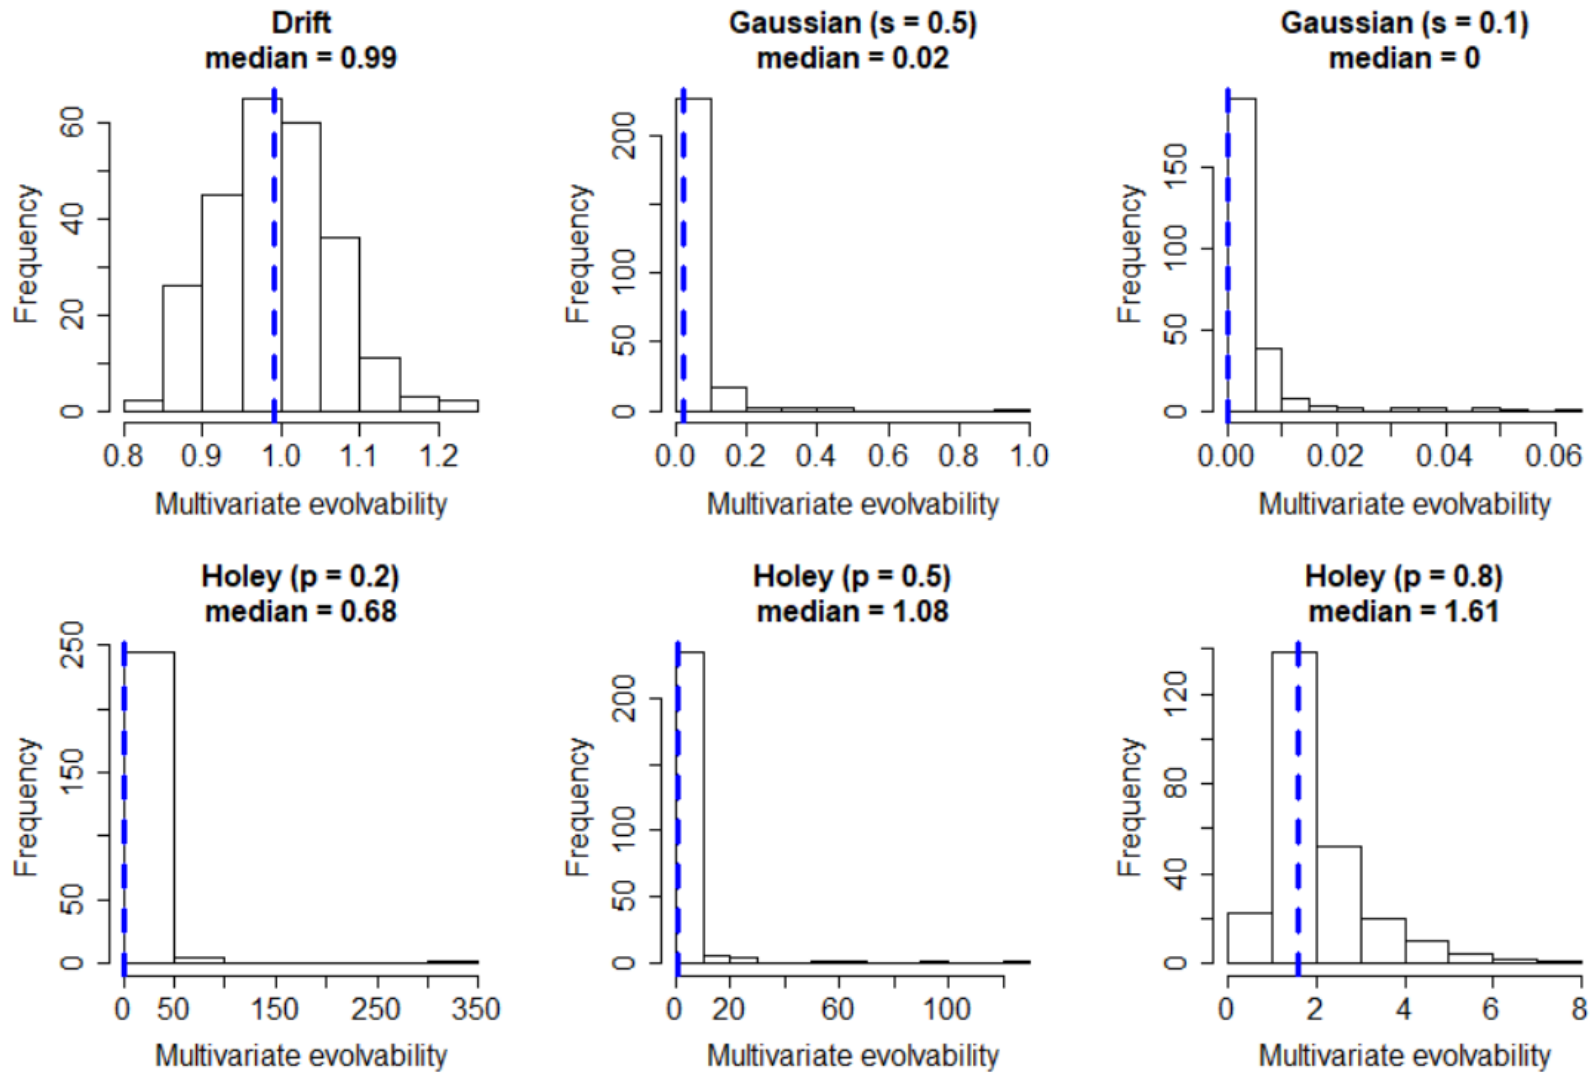

588 Figure S7. Multivariate evolvability after 100 generations in each of six modeling conditions and across 250 simulations. Selection on  
 589 Gaussian surfaces led to a significant reduction in evolvability (Table S6).



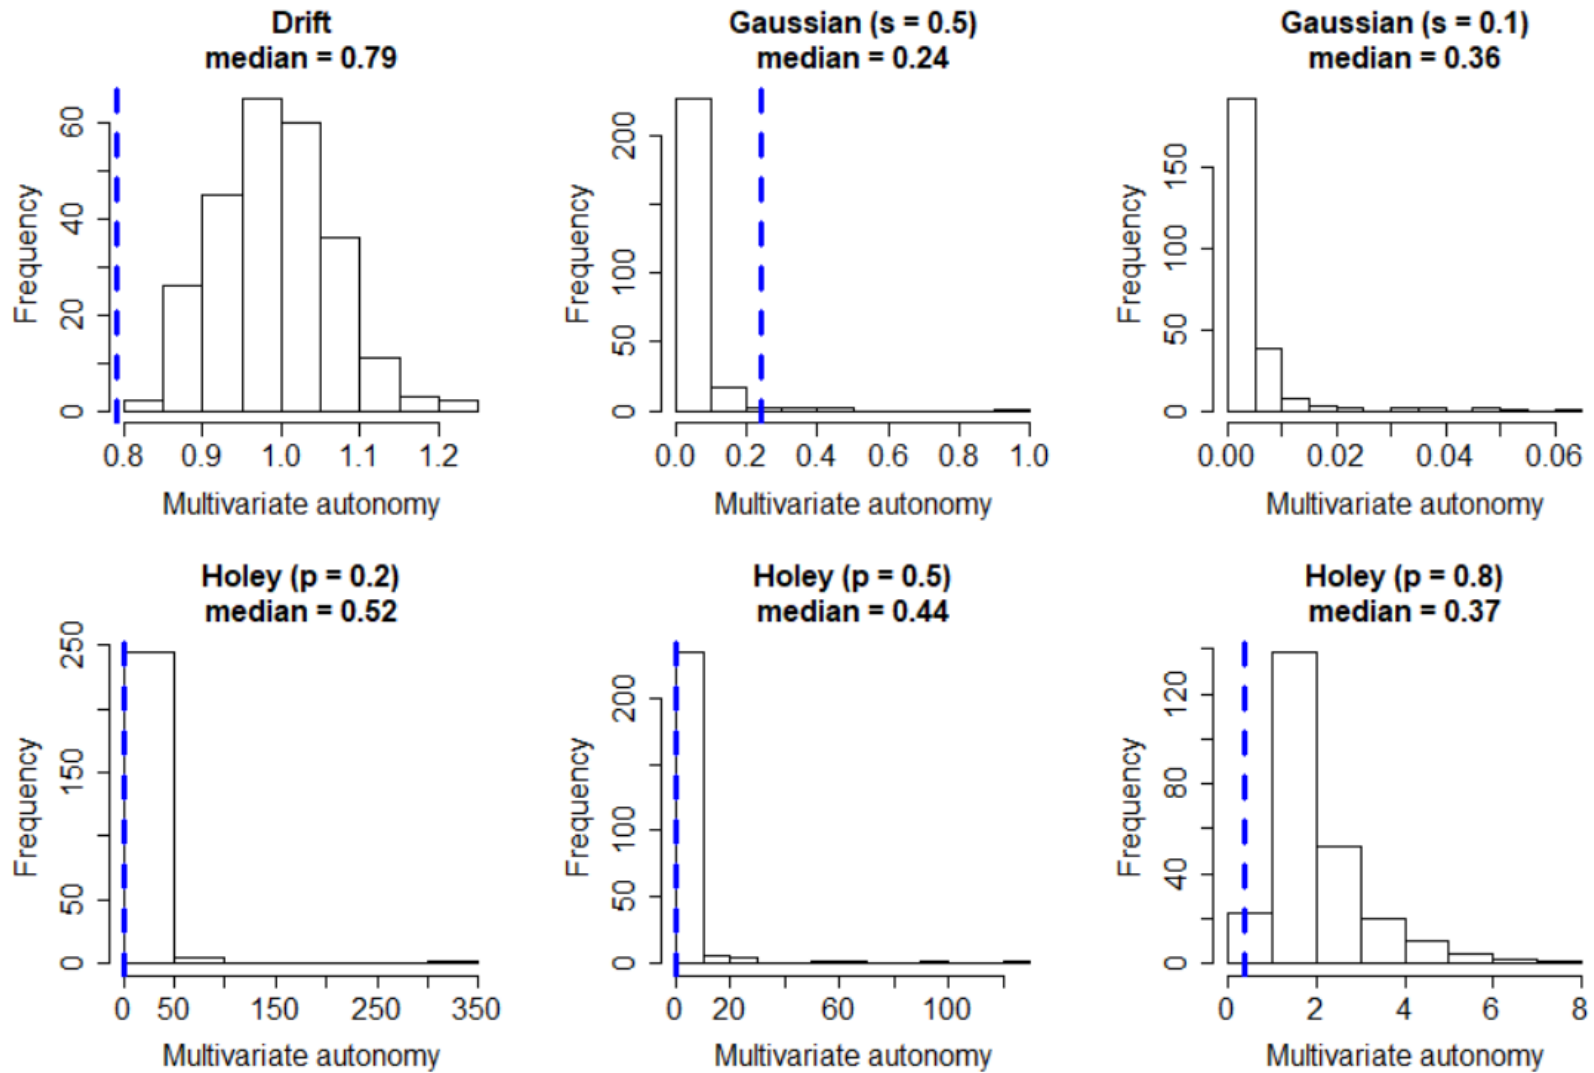

590 Figure S8. Multivariate autonomy after 100 generations in each of six modeling conditions and across 250 simulations. Selection on  
 591 Gaussian surfaces led to a significant reduction in autonomy (Table S7).

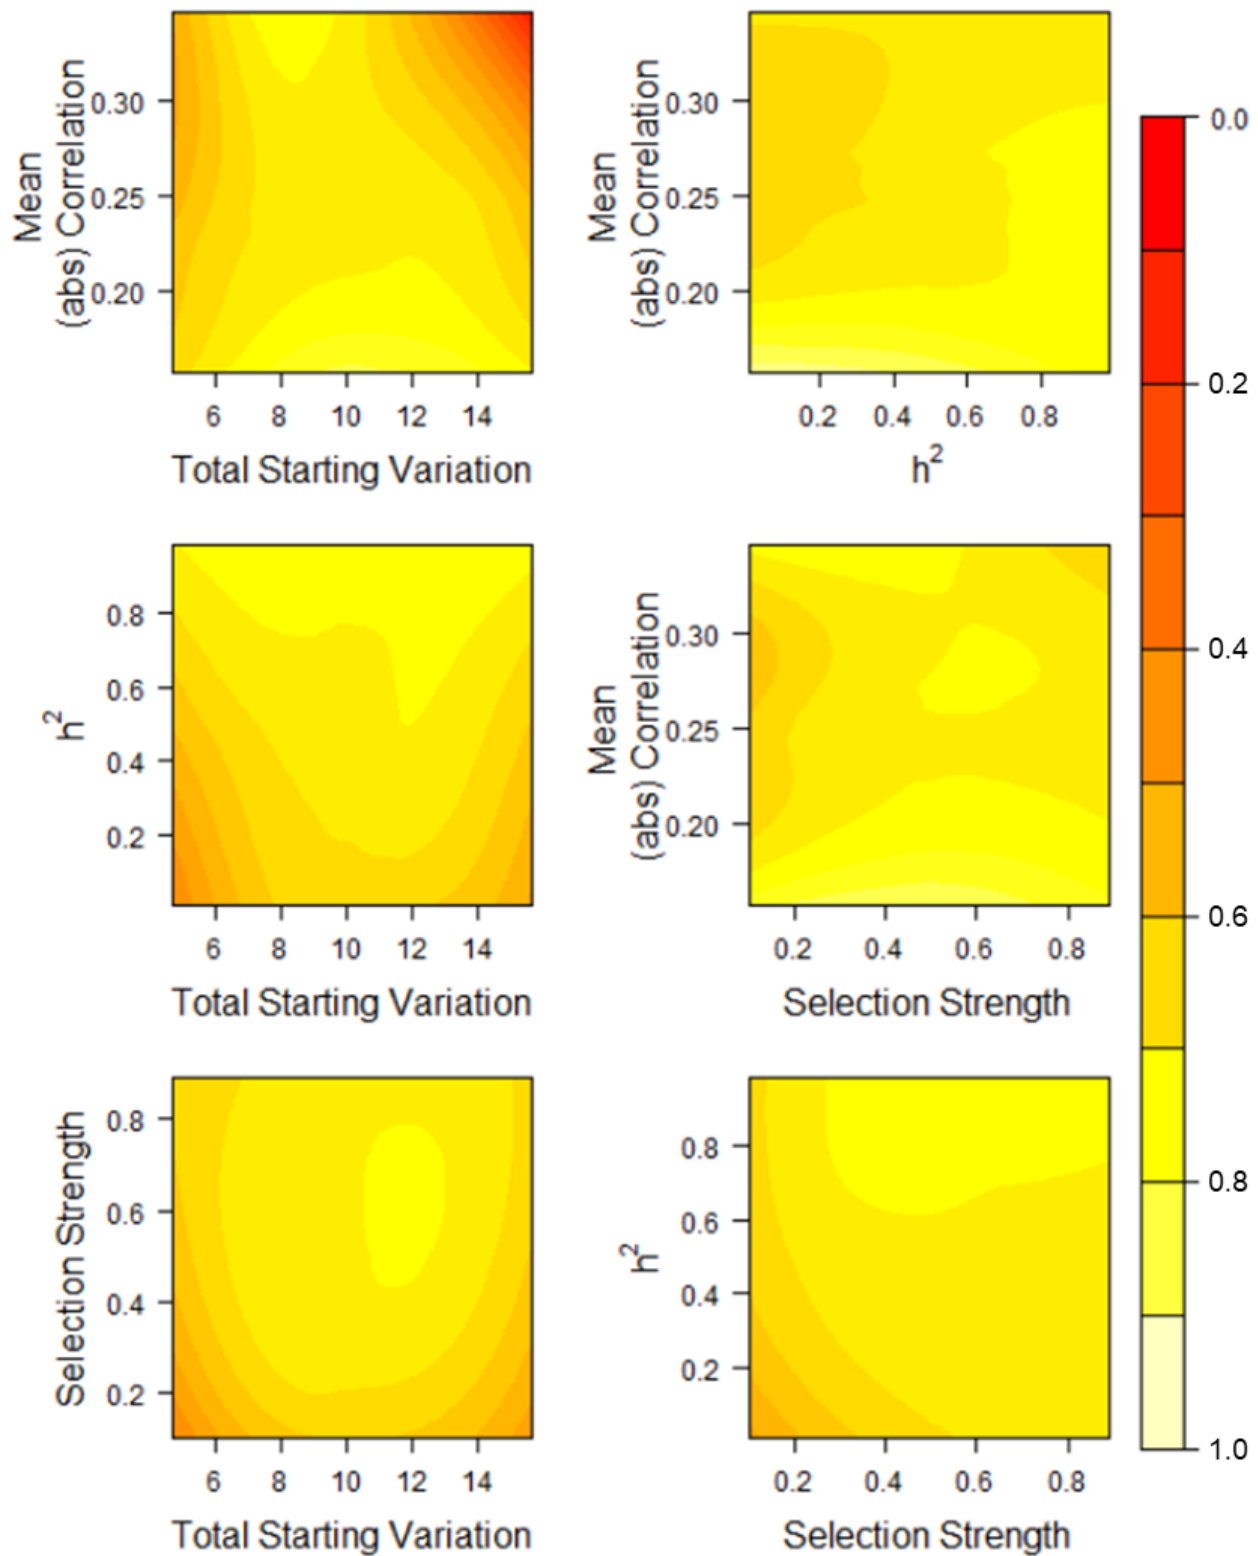

592 Figure S9.  $\lambda_2/\lambda_1$  after selection on Gaussian surfaces remained high regardless of starting  
593 parameters (Table S8).

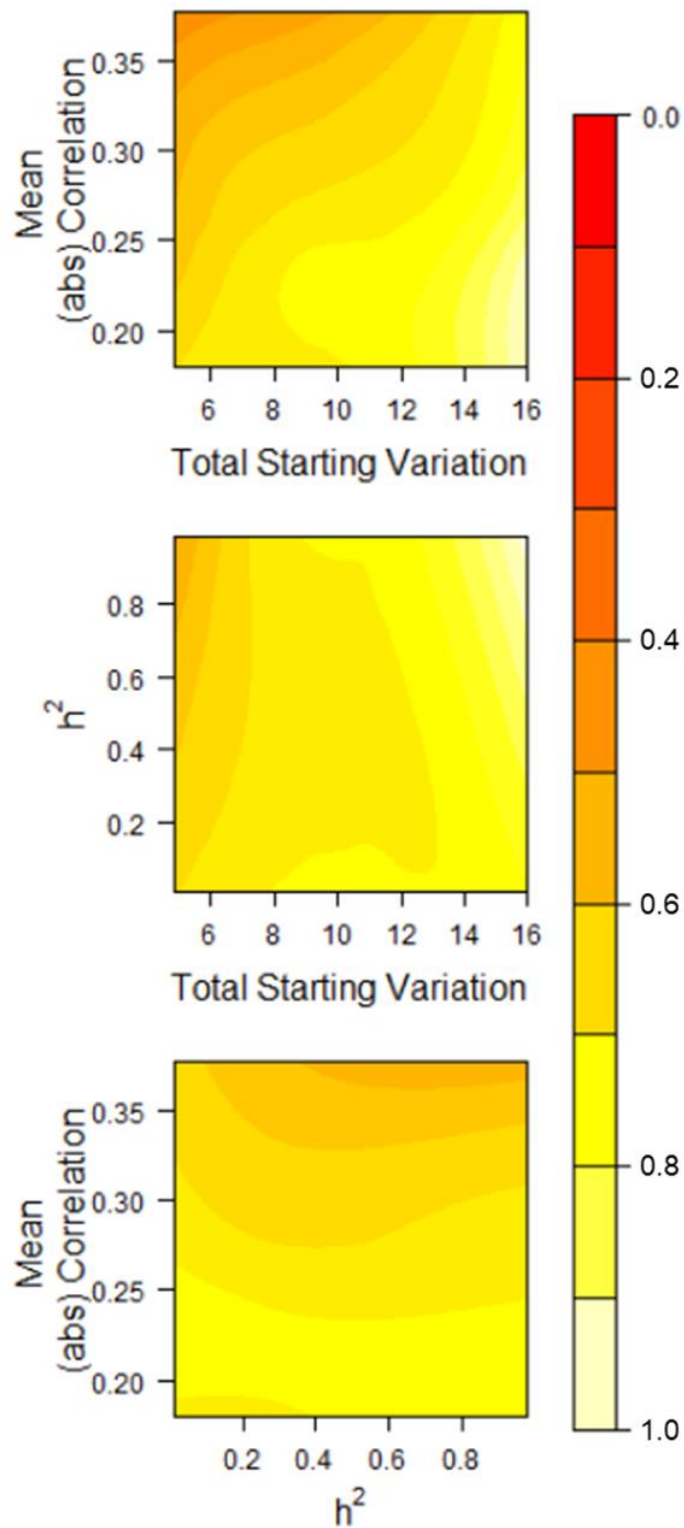

594 Figure S10.  $\lambda_2/\lambda_1$  after evolution due to drift remained high regardless of starting parameters  
595 (Table S9).

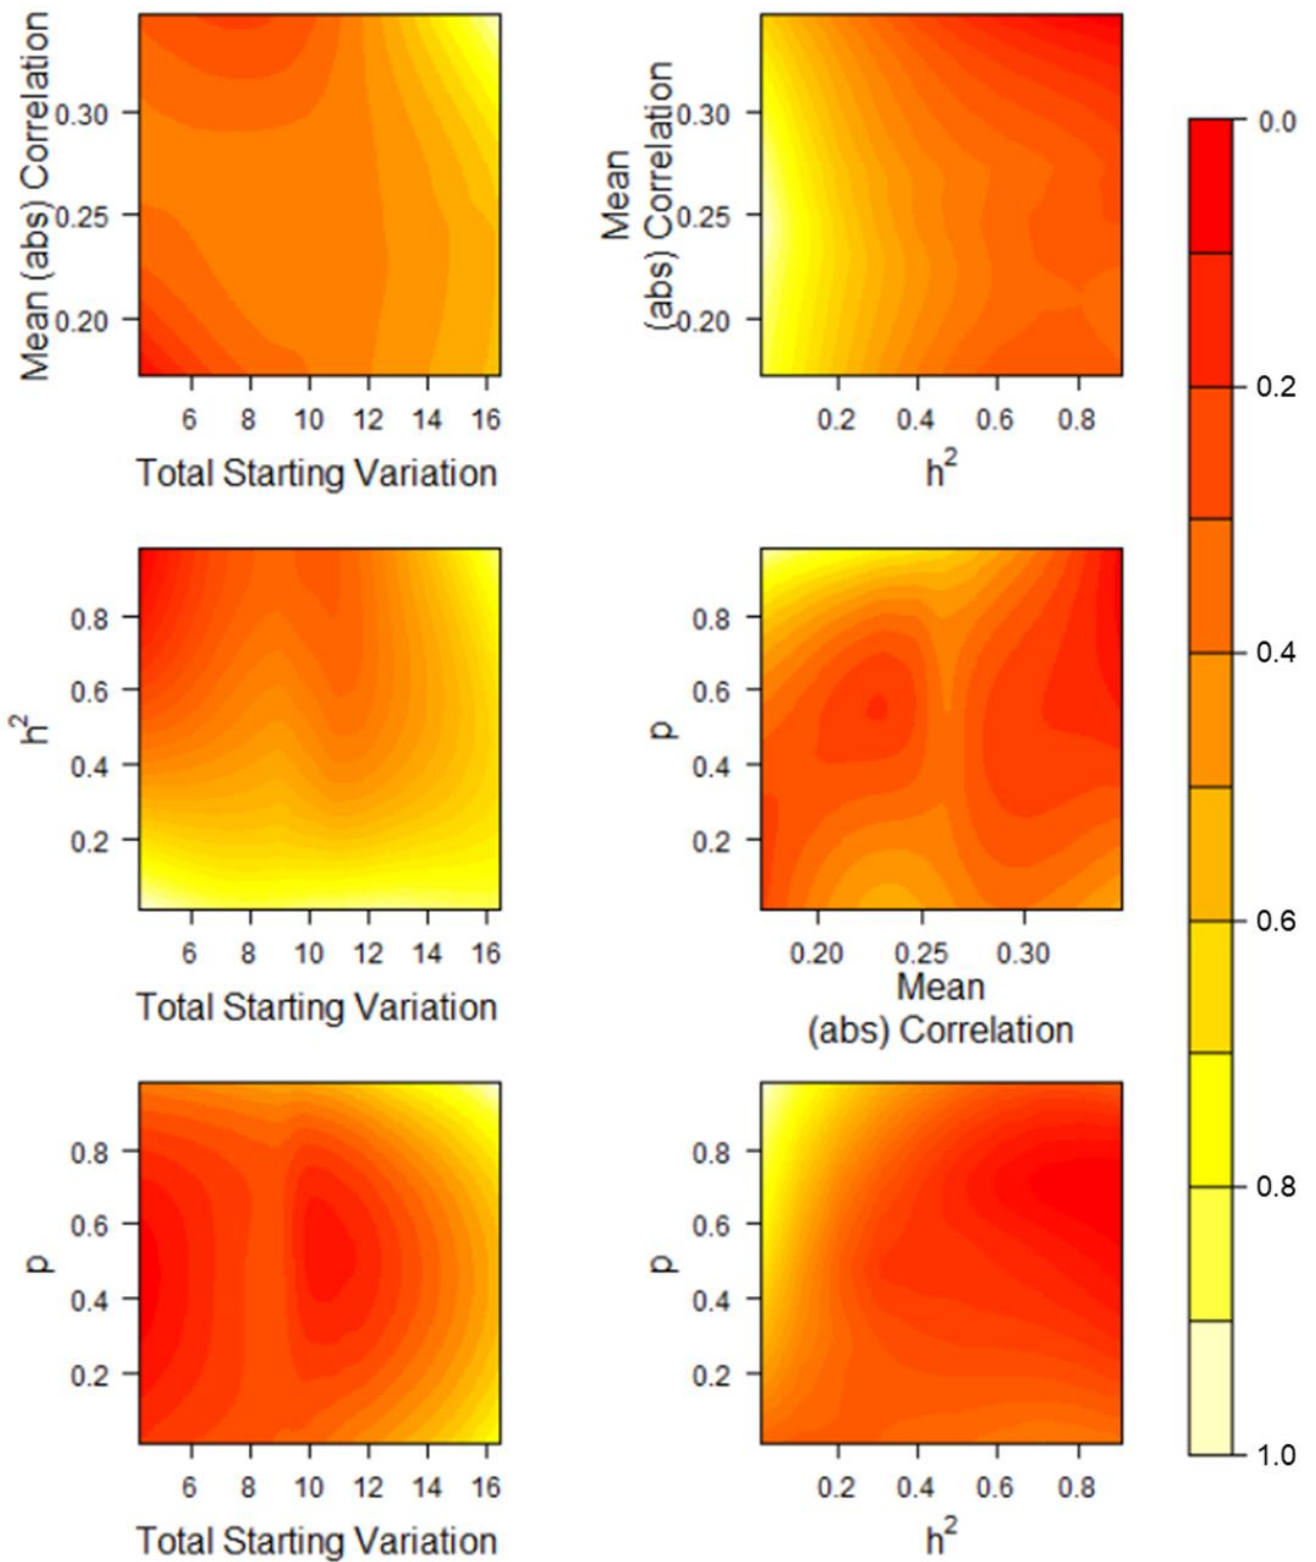

596 Figure S11.  $\lambda_2/\lambda_1$  after evolution on holey landscapes remained low regardless of starting  
597 parameters (Table S10).
